# Supplementary material for: Ciliary length regulation by intraflagellar transport in zebrafish
Source: eLife. 2024 Dec 13;13:RP93168. doi: 10.7554/eLife.93168 (PMC11643619; doi:10.7554/eLife.93168)
Supplement: Figure 3—figure supplement 1—source data 1. [file elife-93168-fig3-figsupp1-data1.xlsx]

## Sheet: Figure 3-figure supplement 1C
	Figure 3-figure supplement 1C		Anterograde and retrograde average velocities in 4dpf crista cilia using two speed calculation methods.
	Manual marking			KymographDirect
	antero	retro		antero	retro
	0.633098	1.58107		0.491778	1.60008
	0.603578	1.59999		0.535305	1.84977
	0.494213	1.55998		0.562685	1.58136
	0.777572	1.38785		0.48507	2.11578
	0.628333	1.84738		0.648685	1.5955
	0.602723	1.39286		0.518311	1.35543
	0.677862	1.5528		0.527	1.53063
	0.649999	1.37025		0.550553	1.79003
	0.46429	1.56898		0.603006	1.5531
	0.54639	1.33561		0.422686	1.54091
	0.535715	1.4054		0.609961	1.60735
	0.579205	1.43682		0.560167	1.60943
	0.642077	1.38126		0.660143	1.95567
	0.525841	1.46546		0.699657	1.48137
	0.468516	1.53638		0.596944	1.82187
	0.591622	1.55998		0.47265	1.80914
	0.454999	1.65747		0.352643	1.60685
	0.639679	1.58722		0.422104	1.76694
	0.689506	1.88982		0.583198	1.83124
	0.717609	1.92291		0.519398	1.94924
	0.690611	1.63913		0.44751	1.72151
	0.649999	1.6095		0.529163	1.69347
	0.619344	1.83395		0.592883	2.01334
	0.689797	1.81998		0.55381	1.77668
	0.790195	1.65956		0.764836	1.67569
	0.60667	1.56558		0.603863	1.64735
	0.60085	1.91829		0.617111	1.84235
	0.862247	1.54238		0.704042	1.79509
	0.862606	1.81341		0.643522	1.58771
	0.710213	1.83185		0.58133	1.86211
	0.649999	1.65795		0.644486	1.59907
	0.654685	1.88425		0.726563	1.45574
	0.702702	1.76431		0.626689	1.50798
	0.658672	1.74175		0.747929	1.65447
	0.665415	1.77792		0.619116	1.83539
	0.802614	1.80143		0.756902	1.48859
	0.869289	1.71934		0.569783	1.78844
	0.518253	1.68237		0.611058	1.83495
	0.571418	1.6972		0.573388	1.9625
	0.630601	1.77272		0.55615	1.48853
	0.564878	2.26662		0.56143	1.51032
	0.588557	1.74752		0.542967	1.98478
	0.709784	2.23165		0.659797	1.72629
	0.555463	1.73333		0.483573	1.92687
	0.63453	1.41557		0.399095	1.76435
	0.670693	1.3		0.513916	1.86594
	0.696061	2.09448		0.5886	1.63982
	0.780008	1.72478		0.462286	1.68361
	0.477354	1.50193		0.443109	1.49609
	0.488716	2.22317		0.606371	1.28919
	0.686108	2.08854		0.754506	1.17331
	0.616507	2.01412		0.58245	1.56836
	0.661155	1.63837		0.708966	1.9725
	0.780008	1.49069		0.691169	1.64463
	0.69128	1.78556		0.578846	1.71012
	0.784303	1.62959		0.794906	2.08943
	0.746085	1.56352		0.712165	1.27157
	0.780008	1.58891		0.623916	1.92691
	0.687501	1.97673		0.776352	1.38423
	0.680953	1.65861		0.734916
	0.741326	2.03127		0.67763
	0.776248	1.97095		0.5999
	0.759293	1.89088		0.597514
	0.786409	1.70625		0.708248
	0.754554	1.44446		0.610437
	0.77081	1.47726		0.609218
	0.684224	1.33058		0.713024
	0.812488	1.90666		0.456453
	0.739824	1.46825		0.718053
	0.717254	1.45755		0.603646
	0.672044	1.6662		0.540229
	0.624865	1.63661		0.636301
	0.576515	1.89867		0.531221
	0.562452	1.68237		0.587921
	0.638975	1.81442		0.35437
	0.653747	1.34685		0.594816
	0.573748	1.70267		0.566759
	0.744457	1.9747		0.327595
	0.609989	1.70625		0.556842
	0.723868	1.48817		0.526781
	0.537919	1.37929		0.626949
	0.560972	1.58068		0.529703
	0.552701	1.87401		0.569355
	0.541244	2.0269		0.679952
	0.606089	1.3
	0.68463	1.68304
	0.828766	1.67498
		1.7125
		1.70125
		1.47207
		1.71934
		1.65337
		1.44446
		1.31911
		1.51139
		1.95644
		1.36342

## Sheet: Figure 3-figure supplement 1E
	Figure 3-figure supplement 1E			Quantification of anterograde and retrograde velocities along the entire length of crista cilia.
	Anterograde
	2	4	6	8	10	12	14	16	18	20	22	24	26
	0.575938	0.537964	0.617356	0.687541	0.665717	0.859372	0.373869	0.795074	0.770949	0.709261	0.893722	0.469748	0.488198
	0.503953	0.505165	0.549074	0.58726	0.573633	0.801902	0.646303	0.829601	0.396237	0.558282	0.63369	0.402596	0.488198
	0.593923	0.476682	0.536417	0.727598	0.401852	0.660519	0.754948	0.775512	0.749418	0.616798	0.768827	0.792655	0.532598
	0.346705	0.508768	0.62632	0.442211	0.592056	0.666315	0.586864	0.391283	0.680996	0.614393	0.685198	0.646643	0.490328
	0.974923	0.390603	0.569987	0.610586	0.763621	0.628217	0.88163	0.556202	0.557978	0.662017	0.361006	0.576256	0.533251
	0.689599	0.674535	0.620931	0.660287	0.66208	0.500542	0.388458	0.427651	0.610378	0.781387	0.606017	0.37809	0.359767
	0.537458	0.566449	0.674119	0.703226	0.5326	0.545624	0.570899	0.610125	0.53154	0.656241	0.3807	0.49132	0.741999
	0.622629	0.620948	0.589705	0.481324	0.490544	0.60606	0.464111	0.471131	0.484632	0.3807	0.407843		0.368587
	0.600681	0.607378	0.635911	0.509687	0.275302	0.686765	0.646303	0.444793	0.460193	0.656241	0.711229
	0.694598	0.703436	0.456498	0.606368	0.466368	0.716981	0.388458	0.471131	0.53154	0.591448	0.585802
	0.495541	0.320708	0.716637	0.774457	0.551146	0.60606	0.473337	0.433402	0.484632	0.723684	0.863023
	0.540148	0.515131	0.456498	0.404388	0.516801	0.686765	0.529626	0.741001	0.808932	0.738458	0.443413
	0.495541	0.463969	0.716637	0.398244	0.386074	0.729659	0.48718	0.678919	0.739099	0.393137	0.441483
	0.540148	0.597247	0.587766	0.603533	0.595357	0.727579	0.534228	0.675936	0.70664	0.509285	0.53569
	0.636358	0.511303	0.5501	0.606368	0.537401	0.731778	0.565701	0.452058	0.392605	0.613656	0.585308
	0.668448	0.320708	0.565636	0.774457	0.551146	0.433195	0.699198	0.615356	0.495549	0.496513	0.556347
	0.530718	0.515131	0.556998	0.352961	0.516801	0.426621	0.378777	0.628248	0.449963	0.506594	0.297635
	0.772593	0.463969	0.535268	0.573913	0.562584	0.589928	0.665876	0.574297	0.432643	0.686615	0.81757
	0.564428	0.597247	0.310426	0.4994	0.50723	0.568204	0.580372	0.490525	0.60864	0.614797	0.574192
	0.513926	0.511303	0.417493	0.597732	0.599643	0.672799	0.716051	0.251958	0.478004	0.573807	0.671857
	0.558758	0.491266	0.403266	0.545166	0.599606	0.548826	0.538887	0.46949	0.444814	0.350598	0.511526
	0.553249	0.700739	0.369744	0.403427	0.300652	0.464557	0.352488	0.500362	0.4612	0.604487	0.592065
	0.550381	0.548712	0.398597	0.347585	0.398081	0.550829	0.402953	0.430567	0.393277	0.634968
	0.50611	0.626617	0.482384	0.667011	0.328813	0.604051	0.300646	0.452124	0.404072	0.621486
	0.713107	0.578078	0.509155	0.606911	0.467176	0.655469	0.59979	0.478705	0.676121
	0.796825	0.511394	0.59454	0.472371	0.493493	0.563228	0.499831	0.287622	0.592576
	0.599648	0.574623	0.576326	0.544917	0.604721	0.506774	0.495185	0.404251	0.862069
	0.617894	0.53336	0.559295	0.605581	0.666137	0.309533	0.46599	0.412046
	0.71435	0.605928	0.567831	0.433109	0.291872	0.406867	0.39852	0.612117
	0.465324	0.639899	0.322539	0.714647	0.608576	0.51703	0.45016	0.533986
	0.526982	0.496394	0.547541	0.543202	0.434924	0.548872	0.45854	0.594606
	0.632805	0.567923	0.465904	0.467168	0.4919	0.617791	0.495142
	0.534066	0.543796	0.546533	0.435662	0.392032	0.527471	0.443085
	0.652872	0.566577	0.488309	0.602196	0.482465	0.507584	0.589078
	0.438217	0.498181	0.624454	0.469467	0.527921	0.48619	0.717879
	0.677908	0.486676	0.688478	0.583416	0.426583	0.566692	0.630302
	0.532795	0.57246		0.588009	0.571415	0.815298	0.841424
		0.514986		0.743219	0.664121	0.772397	0.585667
		0.467682		0.525754	0.461733	0.547873	0.700886
		0.530729			0.575311	0.537263	0.599036
		0.548953			0.820169	0.5674
		0.566068
		0.368132
		0.626295
	Retrograde
	2	4	6	8	10	12	14	16	18	20	22	24	26
	1.69156	1.79406	2.16341	1.99809	1.75881	1.84871	1.81872	1.62731	1.6038	1.57282	2.06326	1.98034	1.74836
	2.42874	1.94095	1.81673	1.82037	1.82661	1.8044	1.75181	1.90843	1.99787	1.94324	1.84927	1.76609	1.44761
	2.47383	1.63648	2.56203	1.82037	1.51902	1.86014	1.63293	1.58839	2.4532	1.52536	1.61004	1.94325	1.49161
	2.45581	2.46161	2.28384	1.78631	1.57879	1.93492	1.97042	1.89995	2.15443	2.21631	1.58424	1.59533
	2.31937	2.45993	2.22953	1.77334	1.73162	1.91818	2.18507	2.21176	1.78687	2.32311	2.19222	1.61957
	1.81226	1.98044	1.78248	1.8048	1.78684	1.57483	1.58737	1.79372	1.87076	1.81645	1.68062	1.642
	1.66269	1.69855	1.78248	1.8048	1.78684	1.57833	1.54803	1.71545	1.94809	1.94607	1.6001	1.55854
	1.59657	1.81244	1.62561	1.78272	1.86147	1.80755	2.09708	1.30303	2.11347	1.80343	1.37559	1.16106
	2.79624	1.67351	2.56421	1.60229	1.69825	1.7862	1.71062	1.66362	1.90545	1.72097	1.60823
	2.09898	1.89253	1.70398	1.81002	1.94268	1.89777	1.87744	1.94424	2.18451	2.12529	1.15178
	1.55206	2.03057	1.58735	1.68111	1.81133	1.76733	1.63386	1.84598	1.55361	1.61982	1.63233
	2.04022	1.58799	1.87007	1.94774	1.37408	1.53669	1.69639	1.9166	1.67967	1.60181	1.52597
	1.46745	1.89595	1.79161	1.77978	1.66118	1.63801	1.89317	2.10042	1.63688	1.60268	1.39864
	1.95515	1.88251	1.74979	1.70492	1.69792	1.7712	1.34492	1.4818	1.59536	1.34729	1.29692
	1.76994	1.83649	1.83728	2.00665	1.87927	1.9048	1.65603	1.73263	1.44171	1.67526	1.60707
	1.99737	1.71704	1.58004	1.77422	1.7281	1.52248	1.57764	1.57398	1.57575	2.00219	1.63554
	1.43725	2.09217	1.57902	1.37399	1.32777	1.51051	1.52887	1.52212	2.0574	1.58946	1.5514
	1.52086	1.79663	2.33685	1.59891	1.5798	1.44336	1.74587	1.70279	1.77098	1.13542	1.88504
	2.97748	1.47444	1.92122	1.8053	1.65063	1.67969	1.53957	1.45823	1.24662	1.24816	1.72168
	1.62713	1.56017	1.90858	1.9714	1.7387	1.69036	1.83621	1.51042	1.72511	1.12139	1.89857
	2.0674	1.95495	1.57112	1.77625	1.98292	1.83107	1.82047	1.9894	1.35246	1.43917
	2.09217	1.63975	1.97091	2.53473	1.80105	1.73772	1.40164	1.40499	1.57772	1.6457
	1.68905	1.86063	1.45995	1.60984	2.04758	1.78758	1.38254	1.86146	1.53889	1.78412
	1.36922	1.60858	1.71878	1.65947	1.53414	1.60079	1.475	1.32395	1.90625	1.53367
	1.81219	1.62698	1.55985	1.55234	1.70686	1.77765	1.59083	2.17235	1.74346	1.4938
	1.86194	1.87282	1.59728	1.69116	1.79595	1.60566	1.5512	1.63834	1.53745	1.48155
	1.51793	1.94822	1.55284	1.74212	1.77058	1.94293	1.49873	1.42286	1.57115	1.49602
	1.65716	1.66587	1.54654	1.61086	1.80925	1.64214	1.39484	1.5981	1.39658	1.71492
	1.5089	1.81414	1.69582	1.75709	1.86105	1.49863	1.43316	1.56139	2.15864	1.6121
	1.82351	1.75876	1.44721	2.14653	1.74074	1.87638	1.60984	1.659	1.46815	1.8893
	1.57217	1.5513	1.87216	1.73497	1.83351	1.49932	1.53279	1.58313	1.80446	1.57388
	2.42686	1.4387	1.834	1.46722	1.61356	1.16282	1.37624	1.24736	1.26991	1.59135
	1.69793	1.65385	1.78171	1.57152	1.92323	1.48748	1.46631	1.48209	1.31525
	1.53541	1.75593	1.68314	1.4241	1.55069	1.56475	1.65807	1.64049	1.74431
	2.14291	1.69561	1.76409	1.36511	1.36595	1.47147	1.62375	1.22838	1.66792
	1.81204	2.14446	1.59462	1.62718	1.61427	1.54005	1.83385	1.56669	1.58872
		2.07053	1.7496	1.6166	1.42867	1.64813	1.58505	1.72598
		1.98464	1.8576	1.57995	1.42845	1.45864	1.77367	1.73065
		1.73613	1.7445	1.72561	1.77949	1.25024	1.77367	1.71457
		1.59511	1.63041	1.82767	1.44661	1.31763	1.44761	1.81467
		1.77652	1.7101	1.8732	1.51079	1.45271	1.55321	1.2084
		1.89456	1.81708	1.69641	1.53182	1.48331	1.42585	1.59252
		2.13686	1.63236	1.65429	1.61668	1.88324	1.3951	1.67687
			1.79862	1.76279	1.75546	2.10085	1.63619	1.72332
			2.00583	1.74728	1.7078	1.95196		1.67985
				1.75056	1.72049	2.24086
				1.74401	2.3117	2.24086
				1.80223	1.69955	1.59412
				1.546	1.73088	1.64765
					1.70452	1.4263
					1.4521	1.42989
					1.56794	1.64451
					1.76194
					1.51939
