# Supplementary material for: Ciliary length regulation by intraflagellar transport in zebrafish
Source: eLife. 2024 Dec 13;13:RP93168. doi: 10.7554/eLife.93168 (PMC11643619; doi:10.7554/eLife.93168)
Supplement: Figure 3—figure supplement 2—source data 1. [file elife-93168-fig3-figsupp2-data1.xlsx]

## Sheet: Figure 3-figure supplement 2D
	Figure 3-figure supplement 2D			Anterograde and retrograde velocities of IFT measured in embryos expressing Tg(βactin:tdTomato-ift43).
	crista		pronephric duct
	antero	retro	antero	retro
	0.654999	1.6123	0.682502	0.904787
	0.673711	1.63299	0.48413	0.974993
	0.646021	1.63749	0.564833	0.78
	0.810937	1.43937	0.370505	0.675991
	0.67759	1.43132	0.529292	0.947158
	0.67426	1.58104	0.533677	0.709099
	0.781785	1.57198	0.513651	0.869141
	0.637289	1.50263	0.482848	0.741954
	0.788965	1.63749	0.451587	0.754001
	0.770602	1.67389	0.40696	0.569996
	0.736882	1.36954	0.418267	0.550597
	0.730155	1.50406	0.389999	0.825895
	0.751641	1.47373	0.168001	0.722212
	0.592617	1.63749	0.305883	0.711165
	0.714532	1.55954	0.249605	0.825895
	0.851504	1.51156	0.425446	0.906482
	0.828788	1.61564	0.389999	0.930953
	0.862671	1.81382	0.480009	0.803634
	0.838392	1.37896	0.554215	0.808899
	0.720506	1.68428	0.327594	0.740995
	0.619598	1.56563	0.436267	0.755635
	0.736882	1.73578	0.417216	0.65001
	0.718393	1.67389	0.417216	0.751109
	0.584455	1.62026	0.398305	0.891426
	0.654999	1.43478	0.416901	0.754001
	0.770602	1.73484	0.445716	0.78
	0.695103	1.67137	0.445716	0.71999
	0.686191	1.65477	0.323773	0.78
	0.718393	1.76565	0.382642	0.721504
	0.684328	1.82467	0.397087	0.799994
	0.770602	1.58419	0.364002	1.04
	0.735438	1.47373	0.296621	0.682502
	0.708699	1.45037	0.273687	0.78
	0.836943	1.7912	0.389999	0.745332
	0.940499	1.57198	0.348944	0.609381
	0.734867	1.96501	0.346659	0.606667
	0.759808	1.83398	0.326185	0.695688
	0.654999	1.86574	0.379454	0.910009
	0.6363	2.43283	0.365628	0.624004
	0.604611	1.89725	0.329068	0.705724
	0.772573	1.84369	0.285007	1.08333
	0.726205	1.60582	0.359998	0.704512
	0.698652	1.69702	0.292499	0.668564
	0.752037	1.75488	0.403002	0.732725
	0.711953	1.7912	0.290854	0.672423
	0.637289	1.94516	0.342721	0.754001
	0.630742	1.91464	0.290854	0.857991
	0.695103	1.46722	0.364002	0.72292
	0.711953	1.67137	0.346659	0.78
	0.800569	1.49193	0.280003	0.869141
	0.608221	1.82467	0.423435	0.706864
	0.714532	1.39735	0.377419	0.891426
	0.683484	1.80127	0.346659	1.15557
	0.793927	1.61823	0.300008	0.642342
	0.674839	1.64684	0.305223	0.685464
	0.698652	1.74666	0.295142	0.529292
	0.716135	1.78309	0.427144	0.740995
	0.774084	1.6531	0.380482	0.947158
	0.824823	1.76849	0.311994	0.910009
	0.68052	1.77237	0.417216	0.748804
	0.6446	1.63749	0.354546	0.857991
	0.712457	1.50406	0.415991	0.857991
	0.601314	1.58419	0.330512	0.78
	0.644259	1.51685	0.307895	0.810002
	0.786008	1.41274	0.321907	0.585002
	0.544147	1.51156	0.372275	0.658125
	0.638194	1.56352	0.65001	0.709099
	0.873331	1.71657	0.458832	0.617489
	0.754257	1.5829	0.491116	0.615786
	0.732044	1.44787	0.476675	0.837766
	0.623043	1.57198	0.408572	0.748804
	0.780421	1.487	0.397087	0.815454
	0.548361	1.57198	0.484865	0.519999
	0.686191	1.5797	0.378865	0.553539
	0.626523	1.9388	0.295142	0.557149
	0.613537	1.92645	0.40625	0.633753
	0.645509	1.61662	0.473576	0.63001
	0.683484	1.89223	0.425446	0.632443
	0.588545	1.63749	0.409492	0.590916
	0.588545	1.68428	0.554215	0.631429
	0.695103	1.58786	0.47561	0.675991
	0.703505	1.53587	0.534857	0.661816
	0.551588	1.57198	0.47272	0.504701
	0.6446	1.53587	0.368338	0.755635
	0.711953	1.9388	0.472106	0.631429
	0.734867	1.96501	0.437554	0.65001
	0.74491	1.90884	0.367057	0.727998
	0.764153	1.75814	0.389999	0.677375
	0.540639	1.59323	0.452896	0.797734
	0.643095	1.70297	0.453497	0.528378
	0.671371	1.70871	0.329341	0.654196
	0.646902	1.67678	0.376076	0.588669
	0.714532	1.59476	0.4415	0.548112
	0.616467	1.67389	0.438754	0.483602
	0.645765	1.67137	0.329998	0.485337
	0.645509	1.86422	0.453825	0.480817
	0.633871	1.45971	0.321174	0.636311
	0.569577	1.62026	0.510554	0.747497
	0.570474	1.59323	0.450007	0.370171
	0.654999	1.53924	0.427746	0.949554
	0.6288	1.44554	0.526037	1.04
	0.720506	1.40142	0.43334	0.897003
	0.654999	1.43841	0.409492	0.881754
	0.63777	1.57198	0.389999	0.903161
	0.703505	1.59476	0.460905	0.98528
	0.664227	1.49714	0.410534	0.968289
	0.631615	1.52835	0.449499	0.926247
	0.579828	1.41919	0.485337	1.02817
	0.62568	1.45884	0.3744	0.78
	0.603004	1.64395	0.389999	0.839997
	0.605888	1.54579	0.321174	0.833789
	0.547206	1.34119	0.365113	0.857991
	0.721459	1.57198	0.343192	0.887574
	0.638618	1.76565	0.342104	0.823329
	0.654999	1.87651	0.408572	0.989994
	0.661901	1.72243	0.40696	1.07251
	0.676836	1.6123	0.371423	0.798152
	0.654999	1.81016	0.389999	0.900012
	0.614067	1.57198	0.233996	0.900012
	0.774084	1.57198	0.290591	0.847828
	0.70327	1.70297	0.319679	0.78
	0.62279	1.70297	0.334292	0.845012
	0.647954	1.68921	0.314333	1.01399
	0.631869	1.69207	0.359998	1.02375
	0.595456	1.51685	0.344997	1.04683
	0.774917	1.73383	0.314998	1.04
	0.719911	1.58577	0.346659	1.02375
	0.711154	1.63749	0.308745	0.78
	0.699651	1.62867	0.344997	1.01399
	0.882243	1.59074	0.292499	1.02375
	0.6802	1.60113	0.300008	0.901887
	0.716402	1.45037	0.29466	0.910009
	0.699857	1.31	0.300008	0.896181
	0.684502	1.43478	0.255004	1.02959
	0.80617	1.60582	0.296403	1.25478
	0.768542	1.58577	0.304392	0.959995
	0.812203	1.66406	0.285362	0.838499
	0.78937	1.42561	0.246322	0.78
	0.790149	1.49714	0.440872	0.882622
	0.786008	1.27806	0.389999	0.877486
	0.700709	1.63749	0.281663
	0.625877	1.67841	0.389999
	0.543182	1.64961	0.238783
	0.61901	1.57874	0.298727
	0.545837	1.47902	0.341244
	0.676141	1.60582	0.40345
	0.795366	1.68077	0.311994
	0.591625	1.60473	0.194996
	0.610139	1.55259	0.440315
	0.683484	1.56563	0.408572
	0.818738	1.68428	0.40696
	0.635735	1.60113	0.288887
	0.771649	1.56563	0.298992
	0.686949	1.5429	0.300008
	0.476361	1.45557	0.54167
	0.530631	1.42911	0.480009
	0.575595	1.5065	0.434999
	0.507616	1.76347	0.579998
	0.577533	1.67137	0.666772
	0.528237	1.60473	0.414891
		1.93225	0.389999
		2.15762	0.519999
		1.86159	0.47864
		1.99945	0.476675
		1.7703	0.495003
		1.93523	0.490641
		1.88885	0.567265
		1.79659	0.501424
		1.65174	0.448085
		1.76347	0.462228
		1.64589
		1.74666
		1.61662
		1.55562
		1.5138
		1.75917
		1.5138
		1.52323
		1.49067
		1.49714
