# Supplementary material for: Ciliary length regulation by intraflagellar transport in zebrafish
Source: eLife. 2024 Dec 13;13:RP93168. doi: 10.7554/eLife.93168 (PMC11643619; doi:10.7554/eLife.93168)
Supplement: Figure 3—figure supplement 3—source data 1. [file elife-93168-fig3-figsupp3-data1.xlsx]

## Sheet: Figure 3-figure supplement 3
	Figure 3-figure supplement 3			Velocity of anterograde and retrograde IFT in crista cilia of different lengths
	＜10 retro	10-18 retro	＞18 retro		＜10 antero	10-18 antero	＞18 antero
	1.1375	1.5108	1.65998		0.559304	0.700007	0.514391
	1.62499	1.48959	1.54265		0.832024	0.688256	0.563342
	1.61088	1.23159	1.8177		0.581164	0.592225	0.665129
	1.3	1.49696	1.84519		0.649999	0.788735	0.736134
	1.67456	1.49258	1.98253		0.537919	0.63616	0.76472
	1.58366	1.41607	1.99816		0.603881	0.840396	0.614174
	1.63257	1.41206	2.02224		0.76845	0.585908	0.669314
	1.32031	1.62052	2.05267		0.772958	0.583125	0.883346
	1.63333	1.63802	1.84889		0.661612	0.671526	0.656478
	1.76948	1.52286	1.6656		0.678266	0.717787	0.755555
	1.80322	1.69493	1.55605		0.675325	0.663841	0.623079
	1.78752	1.89867	1.63702		0.798015	0.696441	0.702966
	1.68237	2.28433	1.69303		0.589925	0.767471	0.684224
	1.71934	1.79832	1.66668		0.649999	0.656706	0.649999
	1.68237	1.87262	1.79245		0.636723	0.588667	0.596724
	1.49022	1.81074	1.7627		0.649999	0.771423	0.654315
	1.56764	2.19372	1.72497		0.629032	0.649999	0.633042
	1.47104	2.23596	1.68407		0.691135	0.68023	0.821064
	1.4438	1.75499	1.81998		0.460763	0.59091	0.708047
	1.88242	1.68998	1.75352		0.552487	0.548046	0.688227
	1.34727	1.57082	1.55998		0.535291	0.567281	0.745904
	1.35416	1.58439	1.75218		0.548446	0.566336	0.966205
	1.38965	1.57658	1.58597		0.570173	0.497072	0.631442
	1.84417	1.68998	1.95762		0.738953	0.655026	0.801674
	1.52809	1.38209	1.52076		0.649999	0.816279	0.841169
	1.36609	1.81074	1.71052		0.705725	0.568199	0.937969
	1.90651	1.79186	1.68571		0.611761	0.582771	0.667564
		1.69793	1.66111		0.633322	0.62548	0.667106
		1.8537	1.68449		0.585908	0.622688	0.655965
		1.83796	1.47529		0.562695	0.792185	0.59091
		1.5726	1.71052		0.631947	0.571418	0.52962
		1.64668	1.41062		0.880001	0.537335	0.59091
		1.69793	1.196		0.667564	0.543882	0.475012
		1.70236	1.74911		0.540712	0.54167	0.659699
		1.75001	1.61514		0.563342	0.571987	0.611013
		1.8023	1.64213		0.599996	0.784674	0.715006
		1.6193	1.70538		0.615174	0.44086	0.513578
		1.40318	1.39286		0.737273	0.544442	0.636329
		1.86878	1.33612		0.700007	0.577764	0.612732
		2.00573	1.75352		0.738953	0.589816	0.59091
		1.91318	1.82233		0.81413	0.641766	0.761273
		1.78752	1.70748		0.558282	0.642528	0.804747
		1.63193	1.47425		0.683471	0.675584	0.649999
		1.89088	1.40318			0.565661	0.664442
		1.39286	1.58169			0.61287	0.685818
		1.55533	1.37558			0.72887	0.697551
		1.59186	1.1598			0.649999	0.850016
		1.70625	1.5275			0.56874	0.658016
		1.61203	1.46248			0.668568	0.68156
		1.482	1.54287			0.489622	0.546603
		1.50394	1.51518			0.561375	0.539887
		1.54999	1.4182			0.772467	0.676853
		1.87018	1.54933			0.517806	0.528457
		1.53878	1.11648			0.620709	0.595845
		1.53443	1.64668			0.559008	0.590336
		1.68049	1.64002			0.547378	0.590007
		2.03784	1.7746			0.595186	0.673626
		1.85714	1.72003			0.5813	0.619038
		1.9741	1.64337			0.821127	0.759202
		1.50527	1.62889			0.582771	0.528801
		1.63549	1.57467			0.649999	0.58659
		1.71598	1.40835			0.60504	0.593212
		1.62499	1.70446			0.747412	0.623274
		1.68237	1.66494			0.74515	0.544495
		1.34642	1.57529			0.538584	0.631779
		1.46248	1.66398			0.641569	0.605924
		1.3	1.71934			0.637257	0.725593
		1.06362	1.51668			0.555543	0.657475
		1.20487	1.73333			0.579531	0.612399
		1.60428	1.8328			0.649999	0.630293
		1.50171	1.80761			0.58905	0.649999
		1.79055	1.63837			0.528563	0.697258
		1.68723	1.60233			0.439697	0.701325
		1.67819	1.77896			0.466671
		1.4182	1.8877			0.701325
		1.73333				0.625927
		1.43828				0.532533
		1.48571				0.693319
		1.38001				0.493097
		1.65456				0.901136
		1.99336				0.631695
		1.74472				0.790723
		1.59794				0.716337
		1.68998				0.695973
		1.62499				0.736613
						0.727528
						0.698691
						0.810596
						0.575701
						0.593952
						0.524363
