# Supplementary material for: Ciliary length regulation by intraflagellar transport in zebrafish
Source: eLife. 2024 Dec 13;13:RP93168. doi: 10.7554/eLife.93168 (PMC11643619; doi:10.7554/eLife.93168)
Supplement: Figure 3—figure supplement 4—source data 1. [file elife-93168-fig3-figsupp4-data1.xlsx]

## Sheet: Figure 3-figure supplement 4C
	Figure 3-figure supplement 4C			Velocity of anterograde and retrograde IFT in pronephric duct single cilia of 30 hpf and 48 hpf zebrafish larvae.
	30h antero	30h retro	48h antero	48h retro
	0.370205	0.939761	0.363772	0.716005
	0.409646	0.895009	0.358005	0.696123
	0.302447	0.887537	0.44751	0.797378
	0.361451	0.895009	0.259238	0.716005
	0.501208	0.877098	0.395693	0.659485
	0.433732	0.877098	0.454215	0.79139
	0.552806	1.04417	0.48504	0.711933
	0.41767	0.689149	0.506032	0.762694
	0.365455	0.797378	0.476147	0.991954
	0.380383	0.77108	0.382871	0.984517
	0.427165	1.01805	0.48504	0.861458
	0.435076	0.867459	0.44461	0.877098
	0.380383	1.07403	0.383984	1.79002
	0.313252	1.00242	0.435076	1.5663
	0.574288	0.923261	0.537	1.39222
	0.506032	0.924859	0.41767	1.1337
	0.433732	0.77108	0.40275	1.17472
	0.41767	0.904958	0.36854	0.898911
	0.517555	0.915674	0.409646	0.898911
	0.487283	0.596676	0.42252	0.911265
	0.464081	1.04417	0.379201	0.939761
	0.426029	0.865166	0.337353	1.11378
	0.409646	1.14244	0.30431	1.07403
	0.282944	0.954672	0.330655	0.877098
	0.48504	0.773919	0.455635	0.793579
	0.428656	1.5036	0.361976	0.835338
	0.38555	0.819288	0.348065	0.845779
	0.33413	0.968246	0.427165	1.15662
	0.382871	0.884486	0.432068	1.00242
	0.361451	0.861458	0.393799	0.995029
	0.39156	1.25301	0.330655	0.887537
	0.556903	0.895009	0.501208	0.918871
	0.428656	1.07403	0.510493	1.17933
	0.428656	1.25301	0.355587	0.974573
	0.427165	1.01805	0.324057	0.918871
	0.313252	1.11065	0.371992	1.02517
	0.365455	0.978925	0.454215	0.716005
	0.303756	0.822288	0.581758	0.921322
	0.365455	1.05516	0.534368	0.845779
	0.41767	1.10559	0.601449	0.626506
	0.45944	0.845779	0.494607	0.939761
	0.296764	0.927227	0.517555	1.06504
	0.32817	1.33133	0.512588	0.923261
	0.371992	0.835338	0.44751	0.710032
	0.537	1.7751	0.464081	1.25301
	0.469881	1.37049	0.469881	1.20079
	0.469881		0.4244	0.995029
	0.453681		0.423316	0.81078
	0.507172		0.375907	0.98062
	0.494607		0.435822	0.939761
	0.591691		0.463066	1.03616
	0.581758		0.533689	1.07029
	0.492251		0.305974	0.81078
	0.375907		0.537	1.25301
	0.581758		0.46163	0.651559
	0.54567		0.38555	1.00242
	0.41767		0.395693	1.15662
	0.257025		0.457828	1.04417
	0.332825		0.343571	1.25301
	0.41218		0.430731	0.971067
	0.265794			1.1635
	0.481935			1.25301
				1.12769
				0.989237
				1.14862
				1.01805
				0.872647
				0.869024
				0.915674
				0.984517
				1.11065
				0.989237
				0.626506

## Sheet: Figure 3-figure supplement 4D_x0009__x0009_
	Figure 3-figure supplement 4D			Length of pronephric duct single cilia of 30 hpf and 48 hpf zebrafish larvae
	30hpf	48hpf
	5.317	4.029
	3.353	5.663
	3.417	6.996
	3.9	3.8
	4.838	5.958
	3.828	4.631
	4.747	5.076
	4.433	3.991
	4.313	5.236
	4.289	5.818
	5.139	4.243
	7.138	4.854
	6.907	5.606
	5.066	4.602
	4.998	5.256
	3.311	5.212
	3.141	6.142
	4.385	3.913
	5.599	7.028
	4.111	6.072
	3.949	6.674
	4.018	6.837
	4.302	3.852
	3.913	4.787
	4.623	5.093
	4.647	4.267
	5.506	3.515
	2.795	5.862
	2.777	4.245
	3.152	3.518
	3.722	4.683
	2.781	3.43
	2.9	2.325
	4.498	2.798
	4.218	2.273
	4.489	3.488
	4.533	3.446
	6.652	5.015
	6.139	6.054
	5.368	4.617
	4.353	4.98
	4.039	6.078
	2.779	4.471
	3.975	4.123
	3.309	3.497
	4.709	2.953
	5.705	5.995
	4.842	3.115
	4.626	4.212
	5.834	4.581
	5.134	3.878
	5.12	4.431
	4.951	4.968
	4.991	5.318
	4.713	5.038
	5.798	4.48
	5.612	4.617
	3.924	4.692
	6.05	2.99
	3.857	2.996
	3.226	6.215
	3.444	3.04
	2.476	6.826
	2.837	4.783
	3.218	3.556
	3.547	6.02
	5.164	4.66
	3.242	6.058
	3.635	6.139
	4.828	4.719
	4.129	3.803
	6.512	6.106
	5.347	5.991
	6.15	6.979
	5.322	6.447
	3.916	4.954
	5.887	4.767
	5.77	4.623
	5.001	4.586
	4.133	4.53
	4.405	5.602
	3.871	6.042
	3.359	4.771
	5.817	4.882
	4.456	5.056
	4.829	3.298
	5.637	4.262
	4.784	5.874
	4.758	2.661
	6.078	3.461
	5.868	1.531
	6.982	3.335
	6.001	3.931
	4.622	3.58
		2.878
		5.106
		2.983

## Sheet: Figure 3-figure supplement 4H
	Figure 3-figure supplement 4H			Velocity of anterograde and retrograde IFT in epidermal cells cilia.
	30hpf antero	4dpf antero	30hpf retro	4dpf retro
	0.334292	0.539997	0.371423	0.701995
	0.231891	0.612852	0.429004	0.709099
	0.504701	0.600009	0.40696	0.78
	0.78	0.468005	0.334292	0.78
	0.519999	0.572003	0.78	0.546
	0.408572	0.389999	0.40696	0.606667
	0.507003	0.600009	0.329998	0.709099
	0.389999	0.585002	0.269992	0.78
	0.422501	0.600009	0.557149	0.519999
	0.436803	0.389999	0.412936	0.567265
	0.354546	0.487493	0.600009	0.539997
	0.311994	0.440872	0.207994	0.519999
	0.402588	0.480009	0.612852	0.709099
	0.307266	0.53626	0.624004	0.624004
	0.642342	0.389999	0.492638	0.557149
	0.78	0.43334	0.714989	0.468005
	0.656844	0.504701	0.410534	0.415991
	0.542599	0.410534	0.451587	0.701995
	0.663011	0.539997	0.519999	0.857991
	0.563341	0.533677	0.550597	0.675991
	0.389999	0.550597	0.504701	0.65001
	0.468005	0.492638	0.410534	0.65001
	0.468005	0.600009	0.682502	0.65001
	0.420004	0.557149	0.71999	0.78
	0.460905	0.53626	0.675991	0.546
	0.451587	0.476675	0.612852	0.420004
	0.519999	0.612852	0.612852	0.857991
	0.474788	0.445716	0.501424	0.701995
	0.410534	0.445716	0.367057	0.857991
	0.507003	0.487493	0.504701	0.701995
	0.422501	0.612852	0.474788	0.585002
	0.487493	0.501424	0.417864	0.596463
	0.507003	0.492638	0.305223	0.675991
	0.389999	0.539997	0.348503	0.585002
	0.451587	0.550597	0.519999	0.78
	0.3744	0.476675	0.633753	0.53626
	0.40696	0.612852	0.49636	0.600009
	0.226449	0.519999	0.458832	0.454992
	0.329998	0.574729	0.451587	0.65001
	0.368338	0.508689	0.585002	0.585002
	0.3744	0.567265	0.533677	0.668564
	0.356569	0.507003	0.576517	0.714989
	0.308367	0.451587	0.602722	0.468005
	0.357507	0.410534	0.59173	0.487493
	0.288268	0.53626	0.546	0.49636
	0.272098	0.600009	0.504701	0.412936
	0.411665	0.49636	0.389999	0.53626
	0.371423	0.539997	0.369471	0.480009
	0.389999	0.539997	0.519999	0.519999
	0.430352	0.519999	0.574729	0.78
	0.389999	0.567265	0.212726	0.78
	0.330914	0.501424	0.600009	0.78
	0.303341	0.504701	0.389999	0.701995
	0.278574	0.412936	0.458832	0.425446
	0.292499	0.369471	0.268119	0.567265
	0.352265	0.567265	0.389999	0.585002
	0.46313	0.504701	0.371423	0.480009
	0.367057	0.519999	0.49636	0.454992
	0.376546	0.504701	0.53626	0.638173
	0.376546	0.482848	0.487493	0.585002
	0.285995	0.487493	0.519999	0.78
	0.210811	0.410534	0.476675	0.65001
	0.289708	0.40696	0.501424	0.724288
	0.20428	0.557149	0.445716	0.78
	0.265913	0.546	0.334292	0.600009
	0.308367	0.557149	0.359998	0.714989
	0.331492	0.454992	0.468005	0.693345
	0.295142	0.585002	0.438754	0.709099
	0.389999	0.638173	0.519999
	0.539997	0.600009	0.78
	0.550597	0.539997	0.668564
	0.412936	0.567265	0.724288
	0.408572	0.65001	0.675991
	0.445716	0.567265	0.688243
	0.436803	0.468005	0.659992
	0.278574	0.501424	0.71999
	0.425446	0.415991	0.73124
	0.451587	0.43334	0.642342
	0.357507	0.600009	0.600009
	0.458832	0.709099	0.600009
	0.389999	0.440872	0.638173
	0.445716	0.659992	0.701995
	0.346659	0.624004	0.638173
	0.40696	0.557149	0.550597
	0.43334	0.557149	0.606667
	0.682502	0.487493	0.501424
	0.43334	0.487493	0.173336
	0.43334	0.557149	0.389999
	0.53626	0.539997	0.567265
	0.693345	0.519999	0.451587
	0.519999	0.557149	0.458832
	0.78		0.173336
	0.49636		0.297136
	0.585002		0.260001
	0.557149		0.250716
	0.550597		0.458832
	0.663011		0.420004
	0.533677		0.49636
	0.531821		0.539997
	0.602722		0.373044
	0.557149		0.438754
	0.476675
	0.420004
	0.492638
	0.422501
	0.482848
	0.492638
	0.482848
	0.43334
	0.389999
	0.606667
	0.468005
	0.606667
	0.65001
	0.501424
	0.389999
	0.445716
	0.425446
	0.492638
	0.507003
	0.389999
	0.519999
	0.438754
	0.487493
	0.600009
	0.468005
	0.43334
	0.389999
	0.415991
	0.468005
	0.40696
	0.180005
	0.201286
	0.519999
	0.468005
	0.487493
	0.260001
	0.539997
	0.519999
	0.557149
	0.408572
	0.501424
	0.596463
	0.550597
	0.557149
	0.542599
	0.624004

## Sheet: Figure 3-figure supplement 4I
	Figure 3-figure supplement 4I			Length of epidermal cells cilia
	30hpf	4dpf
	2.15717	3.87488
	1.72146	2.02535
	2.28088	1.09699
	1.62864	0.913848
	2.64966	1.77107
	1.71241	1.98869
	2.55497	2.13049
	1.65282	2.70254
	1.96404	2.56916
	2.94341	1.3767
	2.15171	1.35205
	2.69412	2.42564
	3.14434	1.40618
	2.09617	2.17277
	2.00054	2.36839
	2.26543	1.3352
	2.38633	1.87559
	2.47915	2.4492
	1.94906	1.82598
	2.52626	1.1168
	2.34125	2.37619
	2.44795	2.5155
	1.82754	1.98557
	1.57934	2.5155
	0.939276	2.81471
	1.9135	2.15171
	0.936	2.07698
	1.09699	1.82005
	1.78932	1.68745
	1.07874	1.51866
	1.37888	1.6745
	0.884208	1.85172
	1.22148	1.61444
	1.18404	1.60196
	1.18607	1.76842
	1.29527	1.71912
	2.73889
	2.68616
	3.12187
	2.05187
