# Supplementary material for: Ciliary length regulation by intraflagellar transport in zebrafish
Source: eLife. 2024 Dec 13;13:RP93168. doi: 10.7554/eLife.93168 (PMC11643619; doi:10.7554/eLife.93168)
Supplement: Figure 3—source data 1. [file elife-93168-fig3-data1.xlsx]

## Sheet: Figure 3F
	Figure 3F	The velocity of anterograde and retrograde IFT in different type of cilia.
	Crista antero	Neuromast antero	Pronephric duct antero	Epidermal cell antero	Spinal cord antero		Crista retro	Neuromast retro	Pronephric duct retro	Epidermal cell retro	Spinal cord retro
	0.818527	0.618036	0.4491	0.334292	0.519999		1.67143	1.64213	0.886357	0.371423	0.468005
	0.858918	0.729257	0.43334	0.231891	0.420004		1.45602	1.80555	0.78	0.429004	0.567265
	0.762065	0.631442	0.445716	0.504701	0.351004		1.81998	1.9882	0.88399	0.40696	0.533677
	0.874552	0.806883	0.445716	0.78	0.420004		1.55998	1.77896	0.824567	0.334292	0.519999
	0.746296	0.595845	0.457239	0.519999	0.427144		1.45602	1.79522	0.968289	0.78	0.557149
	0.905342	0.599996	0.255742	0.408572	0.389999		1.5528	1.64668	0.711165	0.40696	0.688243
	0.711316	0.684224	0.31836	0.507003	0.425446		1.32654	1.68237	0.716744	0.329998	0.550597
	0.749164	0.668568	0.421621	0.389999	0.438754		1.57367	1.44446	0.762261	0.269992	0.663011
	0.649999	0.379162	0.254687	0.422501	0.410534		1.65748	1.81998	0.857991	0.557149	0.688243
	0.686108	0.766676	0.400539	0.436803	0.454992		1.84519	1.62499	1.10278	0.412936	0.572003
	0.812488	0.611761	0.49636	0.354546	0.430352		1.66279	1.41305	1.12127	0.600009	0.531821
	0.754827	0.594281	0.498332	0.311994	0.529292		1.47565	1.58259	0.91449	0.207994	0.300008
	0.742861	0.533328	0.460905	0.402588	0.362147		1.41473	1.81998	0.869141	0.612852	0.635563
	0.752644	0.580838	0.389999	0.307266	0.460905		1.5786	1.55998	1.07713	0.624004	0.468005
	0.800016	0.669688	0.526493	0.642342	0.389999		1.48571	1.66111	0.833789	0.492638	0.510009
	0.942496	0.632424	0.438754	0.78	0.341244		1.4784	1.69566	0.988006	0.714989	0.410534
	0.780008	0.736673	0.548885	0.656844	0.322752		1.83694	1.61203	0.827282	0.410534	0.415991
	0.683065	0.736673	0.371423	0.542599	0.519999		1.87779	1.65456	0.847828	0.451587	0.440872
	0.675988	0.667564	0.344997	0.663011	0.458832		1.68723	1.46248	0.747497	0.519999	0.376546
	0.620904	0.604654	0.401813	0.563341	0.410534		1.72391	1.46248	0.756374	0.550597	0.389999
	0.649999	0.581573	0.41853	0.389999	0.412936		1.50894	1.69566	0.846848	0.504701	0.65001
	0.857453	0.705725	0.420004	0.468005	0.411665		1.63802	1.46248	0.879586	0.410534	0.825895
	0.700007	0.603578	0.505938	0.468005	0.381696		1.42189	1.75884	0.686405	0.682502	0.473576
	0.775817	0.812488	0.454992	0.420004	0.40345		1.74472	1.7815	0.671664	0.71999	0.569996
	0.668568	0.633322	0.409492	0.460905	0.499195		1.58535	1.54999	0.709099	0.675991	0.688243
	0.659699	0.536963	0.389999	0.451587	0.508689		1.45295	1.63702	0.812496	0.612852	0.567265
	0.800016	0.669688	0.334292	0.519999	0.410534		1.59999	1.3	0.696421	0.612852	0.474788
	0.942496	0.631442	0.305883	0.474788	0.389999		1.61514	1.46248	0.752133	0.501424	0.378176
	0.780008	0.611761	0.346659	0.410534	0.510009		1.5275	1.90666	0.700001	0.367057	0.389999
	0.683065	0.679537	0.346659	0.507003	0.468005		1.59794	1.92399	0.812496	0.504701	0.260001
	0.675988	0.599996	0.363107	0.422501	0.519999		1.8023	1.45755	0.751109	0.474788	0.389999
	0.620904	0.602447	0.354546	0.487493	0.491116		1.57082	1.59999	0.811191	0.417864	0.40345
	0.649999	0.668568	0.323422	0.507003	0.462228		1.33822	1.50002	0.78	0.305223	0.317772
	0.857453	0.812488	0.351004	0.389999	0.40696		1.55998	1.17419	0.897003	0.348503	0.402588
	0.700007	0.551523	0.468005	0.451587	0.337294		1.53638	1.45755	0.897003	0.519999	0.357507
	0.775817	0.67098	0.553539	0.3744	0.450007		1.50968	1.19998	0.805151	0.633753	0.65001
	0.668568	0.686108	0.376546	0.40696	0.499195		1.47332	1.67143	0.887574	0.49636	0.519999
	0.663841	0.452174	0.435356	0.226449	0.427746		1.68516	1.67143	0.808899	0.458832	0.492638
	0.588667	0.674086	0.334292	0.329998	0.311994		1.37221	1.6033	0.847828	0.451587	0.373044
	0.622688	0.702702	0.292499	0.368338	0.341244		1.64668	1.58259	0.959995	0.585002	0.468005
	0.595324	0.635542	0.572003	0.3744	0.337294		1.67143	1.92175	0.842412	0.533677	0.362147
	0.802928	0.636723	0.398665	0.356569	0.349663		1.49696	1.46248	0.802288	0.576517	0.425446
	0.507319	0.46429	0.417864	0.308367	0.344119		1.56825	1.85714	1.14946	0.602722	0.451587
	0.547378	0.500013	0.389999	0.357507	0.348944		0.99666	1.81998	1.02208	0.59173	0.364002
	0.640299	0.50408	0.344655	0.288268	0.414367		1.46248	1.36843	1.1375	0.546	0.364002
	0.608522	0.560783	0.442004	0.272098	0.349663		1.44182	1.53215	0.953347	0.504701	0.425446
	0.634137	0.574426	0.427746	0.411665	0.422501		1.82705	1.196	1.0852	0.389999	0.482848
	0.742861	0.56415	0.339996	0.371423	0.305223		1.72391	1.39628	0.904787	0.369471	0.346659
	0.742861	0.510721	0.537925	0.389999	0.242659		1.35416	1.46959	0.835716	0.519999	0.507003
	0.763041	0.519989	0.501424	0.430352	0.323422		1.99999	1.52939	0.956136	0.574729	0.492638
	0.701999	0.539036	0.49028	0.389999	0.445716		1.68237	1.35653	0.974993	0.212726	0.546
	0.684224	0.617508	0.442706	0.330914	0.349663		1.3553	1.75218	0.557149	0.600009	0.519999
	0.773818	0.722234	0.550597	0.303341	0.376546		1.79998	1.71052	0.696421	0.389999	0.615786
	0.768175	0.629032	0.548885	0.278574	0.222851		1.76431	1.71052	0.629021	0.458832	0.404452
	0.776402	0.533328	0.489407	0.292499	0.365628		1.69395	1.46959	0.850922	0.268119	0.389999
	0.775817	0.617508	0.28564	0.352265	0.427746		1.68237	1.63702	0.806896	0.389999	0.460905
	0.667564	0.595845	0.352265	0.46313	0.402588		1.81998	1.42998	0.812496	0.371423	0.546
	0.709077	0.433335	0.379993	0.367057	0.308367		1.80734	1.61381	0.873609	0.49636	0.508689
	0.63616	0.442556	0.367057	0.376546	0.343192		1.69205	1.70347	0.866673	0.53626	0.65001
	0.732722	0.380491	0.445716	0.376546	0.352265		1.40835	1.80868	0.740995	0.487493	0.411665
	0.715006	0.452174	0.510009	0.285995	0.468005		1.5786	1.4182	1.11429	0.519999	0.322752
	0.833977	0.423249	0.431489	0.210811	0.389999		1.65254	1.77272	1.11429	0.476675	0.468005
	0.59091	0.458823	0.425446	0.289708	0.325002		1.74752	1.43682	1.15557	0.501424	0.328427
	0.696441	0.574426	0.472106	0.20428	0.368338		1.62499	1.86878	0.644355	0.445716	0.357507
	0.798796	0.60667	0.415991	0.265913	0.341244		1.75884	1.51668	0.910009	0.334292	0.230454
	0.775817	0.395664	0.445716	0.308367	0.339137		1.71698	1.68237	0.845012	0.359998	0.468005
	0.658016	0.513945	0.415991	0.331492	0.260001		1.79522	1.55998	0.877486	0.468005	0.633753
	0.642359	0.52962	0.482848	0.295142	0.226449		1.53638	1.59543	0.989994	0.438754	0.457239
	0.629901	0.661412	0.401813	0.389999	0.3744		1.36499	1.68998	0.717599	0.519999	0.569182
	0.739644	0.684224	0.464291	0.539997	0.260001		1.64337	1.95	0.988006	0.78	0.512579
	0.679999	0.60667	0.519999	0.550597	0.311994		1.45295	1.70625	0.744551	0.668564	0.504701
	0.661812	0.649999	0.300555	0.412936	0.295858		1.58169	2.08003	0.664443	0.724288	0.542599
	0.574426	0.633322	0.265367	0.408572	0.389999		1.73333	1.70625	0.877486	0.675991	0.445716
	0.735834	0.462219	0.269992	0.445716	0.338005		1.58642	1.95	0.866673	0.688243	0.283635
	0.808109	0.545989	0.190663	0.436803	0.354546		1.63257	1.58891	0.724288	0.659992	0.371423
	0.798577	0.349988	0.460905	0.278574	0.325002		1.44446	1.44446	0.519999	0.71999	0.408572
	0.914062	0.622911	0.329068	0.425446	0.260001		1.68998	1.77272	0.460905	0.73124	0.78
	0.756557	0.525524	0.382354	0.451587	0.3744		1.54763	1.44446	0.530824	0.642342	0.673634
	0.625927	0.490555	0.332457	0.357507	0.354546		1.70625	1.58439	0.499195	0.600009	0.567265
	0.675988	0.505568	0.326185	0.458832	0.316218		1.67143	1.67915	0.742862	0.600009	0.561602
	0.664442	0.51552	0.306889	0.389999	0.298243		1.64213	1.58891	0.682502	0.638173	0.642342
	0.729257	0.750011	0.396008	0.445716	0.341244		1.67631	1.75001	0.78	0.701995	0.78
	0.726456	0.742861	0.53891	0.346659	0.412936		1.76431	1.52939	0.750008	0.638173	0.910009
	0.684224	0.679537	0.490641	0.40696	0.344119		1.82813	1.58259	0.609381	0.550597	0.642342
	0.784489	0.682486	0.600009	0.43334	0.298243		1.73333	1.73333	0.705724	0.606667	0.891426
	0.768175	0.649999	0.561044	0.682502	0.338005		1.64881	1.58259	0.807855	0.501424	0.633753
	0.780008	0.649999	0.581902	0.43334	0.330914		1.60789	1.73333	0.727998	0.173336	1.06363
	0.622911	0.649999	0.548885	0.43334	0.303341		1.7086	1.81998	0.974993	0.389999	0.688243
	0.726456	0.577764	0.598602	0.53626	0.144438		1.67143	1.47332	1.00286	0.567265	0.910009
	0.780008	0.480446	0.655194	0.693345	0.349663		1.79998	1.76431	0.817137	0.451587	0.65001
	0.847815	0.570741	0.49636	0.519999	0.307895		1.49116	1.76431	1.144	0.458832	0.48413
	0.754008	0.604654	0.427144	0.78	0.438754		1.74688	1.62499	1.09623	0.173336	0.542599
	0.754008	0.562156	0.329998	0.49636	0.43334		1.58891	1.35416	0.953347	0.297136	0.537925
	0.659157	0.649999	0.389999	0.585002	0.402588		1.38669	1.50002	0.935986	0.260001	0.430352
	0.732184	0.537919	0.411665	0.557149	0.292499		1.61203	1.59999	1.02959	0.250716	0.503235
	0.716662	0.581573	0.429004	0.550597	0.253949		1.59356	1.50002	1.14946	0.458832	0.49636
	0.565877	0.441518	0.456234	0.663011	0.389999		1.53215	1.64213	1.09199	0.420004	0.487493
	0.672417	0.54167	0.468005	0.533677	0.343192		1.56898	1.6095	1.05677	0.49636	0.389999
	0.795518	0.635542	0.535298	0.531821	0.329998		1.63549	1.62499	1.00286	0.539997	0.230454
	0.684224	0.478951	0.638173	0.602722	0.354546		1.39628	1.52415	0.807855	0.373044	0.376546
	0.625005	0.750011	0.538568	0.557149	0.427746		1.53638	1.48571	0.982212	0.438754	0.354546
	0.684224	0.248929	0.380482	0.476675	0.311994		1.47104	1.63702	0.94249		0.389999
	0.657475	0.664442	0.542033	0.420004	0.311994		1.45919	1.66111	0.891426		0.576517
	0.605675	0.599996	0.450932	0.492638	0.322752		1.45919	1.50314	0.887574		0.78
	0.597713	0.73332	0.504701	0.422501	0.290234		1.65688	1.38126	1.09199		0.3744
	0.780008	0.570741	0.380482	0.482848	0.292499		1.62499	1.55998	0.98348		0.468005
	0.819573	0.582771	0.481757	0.492638	0.235808		1.58366	1.47929	0.953347		0.417864
	0.497878	0.46429	0.417216	0.482848	0.267434		1.58259	1.34332	0.745332		0.260001
	0.636723	0.524997	0.471251	0.43334	0.189091		1.6033	1.3	1.13101		0.260001
	0.629677	0.525524	0.596463	0.389999	0.298243		1.49258	1.52609	1.19999		0.233996
	0.577764		0.563341	0.606667	0.260001		1.35199	1.73333	1.25273		0.227497
	0.638186		0.525008	0.468005	0.226449		1.5116	1.55998	1.31623		0.278574
	0.592992		0.539997	0.606667	0.21938		1.53638	1.42383	1.27399		0.357507
	0.596724		0.576517	0.65001	0.389999		1.63193	1.4345	1.19999		0.321174
	0.67167		0.560631	0.501424	0.232335		1.67915	1.54074	1.09838		0.569996
	0.649999		0.54363	0.389999	0.249605		1.5528	1.81998	1.30763		0.548885
	0.713736		0.539997	0.445716	0.436803		1.60233	1.71598	1.08588		0.445716
	0.663841		0.624004	0.425446	0.337294		1.58891	1.70625	1.00749		0.624004
	0.596724		0.602722	0.492638	0.303341		1.38863	1.70002	0.935986		0.561602
	0.854785		0.49636	0.507003	0.288887		1.54593	1.46959	0.94249		0.668564
	0.691484		0.63064	0.389999	0.337294		1.59714	1.4345	0.881754		0.600009
	0.702702		0.574729	0.519999	0.417864		1.56898	1.40835	1.0174		0.569996
	0.677458		0.458832	0.438754	0.435874		1.54763	1.59999	1.11429		0.567265
	0.791314		0.633753	0.487493	0.427144		1.62499	1.58439	1.43003		0.574729
	0.702702		0.3744	0.600009	0.377419		1.69658	1.52286	1.18559		0.542599
	0.928582		0.65001	0.468005	0.389999		1.60789	1.62499	1.08645		0.430352
	0.711906		0.498332	0.43334	0.3744		1.60726	1.63702	0.968289		0.642342
	0.731257		0.471622	0.389999	0.304392		1.55434	1.67915	1.15145		0.519999
	0.686805		0.502676	0.415991	0.365628		1.81315	1.53334	0.947158		0.531821
	0.683065		0.353594	0.468005	0.468005		1.6865	1.60588	1.15557		0.585002
	0.717905		0.519999	0.40696	0.3744		1.7086	1.79998	1.14705		0.546
	0.678266		0.323422	0.180005	0.567265		1.74688	1.64213	0.930953		0.550597
	0.675008		0.468005	0.201286	0.519999		1.73333	1.58891	0.756374		0.642342
	0.678266		0.407722	0.519999	0.298727		1.86337	1.56898	0.981297		0.561602
	0.713736		0.420004	0.468005	0.334292		1.55998	1.69566	1.00749		0.678259
	0.701999		0.435874	0.487493	0.617489		1.6095	1.50968	1.38665		0.480009
	0.649999		0.429004	0.260001	0.464291		1.3975	1.64414	1.06738		0.408572
	0.660327		0.468005	0.539997	0.349663		1.22974	1.59999	0.995164		0.093603
	0.649999		0.544176	0.519999	0.378176		1.55159	1.58891	1.29001		0.232335
	0.634895		0.464291	0.557149	0.417864		1.36666	1.35199	1.02817		0.272098
	0.616952		0.417216	0.408572	0.404452		1.53334	0.966663	1.13453		0.189091
	0.570173		0.346659	0.501424	0.430352		1.49696	1.19165	1.19292		0.283635
	0.610598		0.421621	0.596463	0.3744		1.43682		1.144		0.129995
	0.642698		0.211249	0.550597	0.301931		1.51668		0.953347		0.468005
	0.527717		0.292499	0.557149	0.487493		1.33095		0.747497		0.207994
	0.553183		0.365628	0.542599	0.354546		1.84519		0.898173		0.242062
	0.503219		0.519999	0.624004	0.266339		1.51668		0.422501		0.436803
	0.770381		0.389999		0.408572		1.38669		0.585002		0.194996
	0.614868		0.504701		0.278574		1.3		0.705724		0.272999
	0.674691		0.454992		0.306433		1.12896		0.530406		0.519999
	0.573233		0.339672		0.606667		1.22352		0.684499		0.688243
	0.517464		0.316218		0.519999		1.32132		0.644355		0.624004
	0.506326		0.288887		0.389999		1.25667		0.713137		0.445716
	0.577764		0.247311		0.305223		1.40835		0.594287		0.389999
	0.739223		0.348503		0.450007		1.13999		0.557149		0.373044
	0.638975		0.311994		0.339137		1.3		0.668564		0.339137
	0.700007		0.334292		0.462228		1.38126		0.668564		0.440872
	0.701999		0.423435		0.3744		1.45602		0.722212		0.451587
	0.549302		0.49028		0.377419		1.3		0.573533		0.410534
	0.577764		0.322178		0.298727		1.34817		0.585002		0.531821
	0.56666		0.308367		0.238783		1.5213		0.600009		0.389999
	0.685441		0.357507		0.401813		1.20369		0.78		0.267434
	0.866664		0.42679		0.330914		1.84164		0.695688		0.468005
	0.768175		0.417864		0.378176		1.5108		0.78		0.546
	0.771178		0.410534		0.185707		1.67143		0.600009		0.492638
	0.76472		0.354546		0.343192		1.53334		0.503235		0.295858
	0.731257		0.412083		0.435874		1.66668		0.497872		0.334292
	0.67167		0.341244		0.321174		1.73333		0.597996
	0.680953		0.379168		0.474788		1.62499		0.63001
	0.829308		0.348944		0.454992		1.54074		0.78
	0.631442		0.278574		0.440872		1.71362		0.682502
	0.712909		0.297822		0.533677		1.73333		0.794704
	0.597301		0.301603		0.389999		1.6972		0.798152
	0.649999		0.360758		0.287371		1.8515		0.611774
	0.701999		0.438754		0.40345		1.69303		0.532679
	0.613203		0.339137		0.362147		1.65748		0.686405
	0.669688		0.323996		0.519999		1.6774		0.658125
	0.557154		0.460336		0.440872		1.81074		0.760002
	0.795923		0.302448		0.435874		1.59248		0.716744
	0.756375		0.24375		0.487493		1.82705		0.887574
	0.700007		0.411665		0.331492		1.42498		0.752632
	0.742861		0.303341		0.216665		1.49258		0.78
	0.622911		0.256572		0.152196		1.42189		0.78
	0.685122		0.282125		0.404452		1.6033		0.87177
	0.698135		0.150967		0.19953		1.6774		0.78
	0.707341		0.293773		0.212726		1.42189		0.690863
	0.611761		0.385178		0.369471		1.6656		0.827745
	0.733858		0.348503		0.246322		1.52415		1.03352
	0.715952		0.351545		0.414367		1.48571		0.906962
	0.60938		0.307266		0.301368		1.46773		0.714989
	0.745904		0.356289		0.371423		1.62499		0.817137
	0.760389		0.377806		0.327097		1.54528		0.935986
	0.687153		0.361468		0.364002		1.44446		0.682502
	0.557154		0.457239		0.352265		1.43929		0.901887
	0.661812		0.47806		0.440872		1.49833		0.794177
	0.771178		0.436803		0.278574		1.54895		0.63064
	0.719149		0.537925		0.389999		1.4182		0.67499
	0.815267		0.443174		0.271304		1.64414		0.635563
	0.649999		0.502676		0.317772		1.63549		0.567265
	0.588093		0.489767		0.493992		1.65456		0.567265
	0.632901		0.425446		0.132459		1.55998		0.877486
	0.614285		0.389999		0.362147		1.47332		0.953347
	0.620904		0.370505		0.226449		1.59248		0.828759
	0.60667		0.439992		0.289708		1.45688		0.862093
	0.856086		0.425446		0.292499		1.50394		0.78
	0.768175		0.481757		0.352265		1.54763		0.760984
	0.7511		0.389999		0.253498		1.7432		0.835716
	0.681965		0.460905				1.49622		0.866673
	0.557154		0.431792				1.53112		0.94249
	0.835707		0.435356				1.65688		0.904787
	0.856086		0.49028				1.64668		0.877486
	0.90605		0.421973				1.53638		0.804364
	0.827267		0.515097				1.5213		0.910009
	0.905342		0.380482				1.58891		0.92183
	0.815678		0.505551				1.58535		0.850922
	0.789294		0.438754				1.71598		0.799017
	0.7694		0.397962				1.3		1.00286
	0.742861		0.383808				1.57574		0.760002
	0.766676		0.3744				1.70002		0.799491
	0.754827		0.429571				1.45852		0.759471
	0.853129		0.343728				1.66668		0.838881
	0.819573		0.420004				1.6178		0.845012
	1.02789		0.389999				1.73333		0.953347
	0.866664						1.56981		1.00286
	0.812488						2.00573		0.940583
	0.742861						1.86337		1.01832
	0.829787						1.86878		1.03434
	0.89253						2.18216		0.801672
	0.831992						1.71934		0.585002
	0.755829						1.5786
	0.887798						2.0719
	0.923691						2.04847
	0.983789						1.79998
	0.673223						1.73333
	0.742861						1.69395
	0.760968						1.88277
	0.789294						2.21766
	0.729257						1.73333
	0.759994						2.00911
	0.739223						1.76431
	0.698135						1.79707
	0.631947						1.70625
	0.700007						1.45474
	0.649999						1.3975
	0.679104						1.49622
	0.731257						1.55998
	0.7694						1.80868
	0.661012						1.4978
	0.689797						1.64491
	0.604654						1.57501
	0.833977						1.55998
	0.818527						1.59999
	0.838724						1.86219
	0.866664						2.01721
	0.774986						1.7815
	0.911928						2.1185
	0.83699						1.43264
	0.817134						1.64337
	0.638609						1.72159
	0.579994						1.67631
	0.747956						1.67143
	0.715006						1.78288
	0.670319						1.89088
	0.649999						1.79311
	0.760968						1.55159
	0.794458						1.73333
	0.841169						1.49116
	0.866664						1.4978
	0.884707						1.58597
	0.750707						1.54074
	0.686108						1.5786
	0.604212						1.6033
	0.674432						1.61624
	0.69431						1.54999
	0.6835						1.70236
	0.688227						1.33612
	0.592225						1.26831
	0.577764						1.42263
	0.706166						1.53334
	0.717905						1.54189
	0.637736						1.495
	0.771178						1.55998
	0.620012						1.73333
	0.833977						1.70347
	0.775448						1.482
	0.776402						1.61705
	0.809431						1.6865
	0.725593						1.5721
	0.759994						1.71598
	0.705079						1.78046
	0.771884						1.77272
	0.678266						1.64881
	0.640299						1.55434
	0.649999						1.65748
	0.882153						1.62499
	0.728005						1.63427
	0.666676						1.44132
	0.643008						1.64881
	0.678266						1.495
	0.649999						1.53334
	0.678266						1.68407
	0.585007						1.58891
	0.786037						1.58535
	0.690611						1.85714
	0.856086						1.54763
	0.806003						1.50968
	0.780008						1.59543
	0.71409						1.54074
	0.724046						1.49364
	0.751948						1.31998
	0.687153						1.4
	0.879405						1.65456
	0.750707						1.55998
	0.659414						1.58039
	0.598676						1.57501
	0.551094						1.47332
	0.60938						1.75103
	0.565229						1.49258
	0.636723						1.42498
	0.754827						1.56591
	0.751554						1.51668
	0.693319						1.53638
	0.733858						1.58259
	0.718408						1.67498
	0.72878						1.59186
	0.637257						1.60588
	0.713736						1.79397
	0.587683						1.53112
	0.649999						1.41305
	0.819573						1.62499
	0.585007						1.42094
	0.604654						1.54593
	0.615785						1.42998
	0.662755						1.70785
	0.830554						1.68723
	0.695769						1.64414
	0.711906						1.3951
	0.684224						1.68237
	0.649999						1.57703
	0.710668						1.43264
	0.729824						1.42039
	0.659699						1.44
							1.49833

## Sheet: Figure 3H
	Figure 3H	Left, statistics analysis of cilia length in different tissues of Tg(hsp70l:ift88-GFP) larvae.							Right, anterograde and retrograde IFT average velocity in different tissues of zebrafish.
	Crista	Neuromast	Pronephric duct	Spinal cord	Epidermal cell				Crista antero	Neuromast antero	Pronephric duct antero	Epidermal cell antero	Spinal cord antero		Crista retro	Neuromast retro	Pronephric duct retro	Epidermal cell retro	Spinal cord retro
	28.35	15.8007	8.28837	3.05183	1.87855				0.818527	0.618036	0.4491	0.334292	0.519999		1.67143	1.64213	0.886357	0.371423	0.468005
	14.3801	11.5309	8.01209	2.58227	1.12492				0.858918	0.729257	0.43334	0.231891	0.420004		1.45602	1.80555	0.78	0.429004	0.567265
	28.8873	16.0719	9.8588	5.39963	2.09882				0.762065	0.631442	0.445716	0.504701	0.351004		1.81998	1.9882	0.88399	0.40696	0.533677
	21.9032	17.2165	8.71006	2.24983	1.1881				0.874552	0.806883	0.445716	0.78	0.420004		1.55998	1.77896	0.824567	0.334292	0.519999
	28.2087	16.0868	8.75368	3.1395	2.86806				0.746296	0.595845	0.457239	0.519999	0.427144		1.45602	1.79522	0.968289	0.78	0.557149
	12.6549	16.1188	6.87789	5.44783	2.09882				0.905342	0.599996	0.255742	0.408572	0.389999		1.5528	1.64668	0.711165	0.40696	0.688243
	30.6286	15.2612	5.94727	5.23224	2.38633				0.711316	0.684224	0.31836	0.507003	0.425446		1.32654	1.68237	0.716744	0.329998	0.550597
	25.4845	12.963	6.79065	5.77153	1.74408				0.749164	0.668568	0.421621	0.389999	0.438754		1.57367	1.44446	0.762261	0.269992	0.663011
	21.0727	18.2669	6.47074	3.9454	1.62864				0.649999	0.379162	0.254687	0.422501	0.410534		1.65748	1.81998	0.857991	0.557149	0.688243
	32.925	13.2999	8.05571	2.24203	1.404				0.686108	0.766676	0.400539	0.436803	0.454992		1.84519	1.62499	1.10278	0.412936	0.572003
	29.9107	18.9746	4.84215	4.74802	0.9867				0.812488	0.611761	0.49636	0.354546	0.430352		1.66279	1.41305	1.12127	0.600009	0.531821
	28.1561	11.822	8.84093	3.33606	2.12176				0.754827	0.594281	0.498332	0.311994	0.529292		1.47565	1.58259	0.91449	0.207994	0.300008
	29.4797	18.7665	10.1642	3.24012	2.5155				0.742861	0.533328	0.460905	0.402588	0.362147		1.41473	1.81998	0.869141	0.612852	0.635563
	30.2725	18.6756	4.9294	3.22639	2.57275				0.752644	0.580838	0.389999	0.307266	0.460905		1.5786	1.55998	1.07713	0.624004	0.468005
	9.90255	18.2771	8.78276	3.55742	1.99774				0.800016	0.669688	0.526493	0.642342	0.389999		1.48571	1.66111	0.833789	0.492638	0.510009
	27.9887	14.443	7.05239	2.5155	1.4717				0.942496	0.632424	0.438754	0.78	0.341244		1.4784	1.69566	0.988006	0.714989	0.410534
	31.1599	14.1794	9.59706	2.496	1.77871				0.780008	0.736673	0.548885	0.656844	0.322752		1.83694	1.61203	0.827282	0.410534	0.415991
	14.061	14.3335	8.65189	3.09644	2.27245				0.683065	0.736673	0.371423	0.542599	0.519999		1.87779	1.65456	0.847828	0.451587	0.440872
	30.6802	14.6589	8.14296	3.6206	1.4717				0.675988	0.667564	0.344997	0.663011	0.458832		1.68723	1.46248	0.747497	0.519999	0.376546
	25.7674	16.8191	7.88122	3.2863	2.45372				0.620904	0.604654	0.401813	0.563341	0.410534		1.72391	1.46248	0.756374	0.550597	0.389999
	30.0252	9.64579	8.88455	2.08135	1.4717				0.649999	0.581573	0.41853	0.389999	0.412936		1.50894	1.69566	0.846848	0.504701	0.65001
	32.8443	20.3029	7.69219	1.83331	1.90429				0.857453	0.705725	0.420004	0.468005	0.411665		1.63802	1.46248	0.879586	0.410534	0.825895
	19.6413	20.5987	7.64857	2.13049	2.03393				0.700007	0.603578	0.505938	0.468005	0.381696		1.42189	1.75884	0.686405	0.682502	0.473576
	20.8036	18.8931	8.78276	2.82532	1.68012				0.775817	0.812488	0.454992	0.420004	0.40345		1.74472	1.7815	0.671664	0.71999	0.569996
	23.9523	13.3416	4.49317	3.57521	1.53644				0.668568	0.633322	0.409492	0.460905	0.499195		1.58535	1.54999	0.709099	0.675991	0.688243
	20.2552	9.26301	10.7749	2.23361	1.81927				0.659699	0.536963	0.389999	0.451587	0.508689		1.45295	1.63702	0.812496	0.612852	0.567265
	31.3724	15.196	7.28504	4.24616	2.0929				0.800016	0.669688	0.334292	0.519999	0.410534		1.59999	1.3	0.696421	0.612852	0.474788
	18.9036	16.2967	7.99755	2.57275	1.33286				0.942496	0.631442	0.305883	0.474788	0.389999		1.61514	1.46248	0.752133	0.501424	0.378176
	28.3681	15.7766	8.39016	3.69392	1.41258				0.780008	0.611761	0.346659	0.410534	0.510009		1.5275	1.90666	0.700001	0.367057	0.389999
	27.4738	15.5641	8.0848	3.97722	2.61503				0.683065	0.679537	0.346659	0.507003	0.468005		1.59794	1.92399	0.812496	0.504701	0.260001
	22.3798	14.8971	10.5859	3.70812	1.8979				0.675988	0.599996	0.363107	0.422501	0.519999		1.8023	1.45755	0.751109	0.474788	0.389999
	28.8538		7.5177	3.94774	1.33286				0.620904	0.602447	0.354546	0.487493	0.491116		1.57082	1.59999	0.811191	0.417864	0.40345
	16.8605		6.1363	3.29098	2.5155				0.649999	0.668568	0.323422	0.507003	0.462228		1.33822	1.50002	0.78	0.305223	0.317772
	24.6733		6.93606	2.37682	3.0824				0.857453	0.812488	0.351004	0.389999	0.40696		1.55998	1.17419	0.897003	0.348503	0.402588
	27.1898		7.5177	3.51733	1.68012				0.700007	0.551523	0.468005	0.451587	0.337294		1.53638	1.45755	0.897003	0.519999	0.357507
	31.7224		7.69219	3.00191	1.90429				0.775817	0.67098	0.553539	0.3744	0.450007		1.50968	1.19998	0.805151	0.633753	0.65001
	31.6339		5.32201	5.15752	1.56				0.668568	0.686108	0.376546	0.40696	0.499195		1.47332	1.67143	0.887574	0.49636	0.519999
	24.4645		9.11721	5.02944	2.09882				0.663841	0.452174	0.435356	0.226449	0.427746		1.68516	1.67143	0.808899	0.458832	0.492638
	29.5298		10.1496	4.26254	2.34				0.588667	0.674086	0.334292	0.329998	0.311994		1.37221	1.6033	0.847828	0.451587	0.373044
	30.6778		10.0188	3.21454	1.87855				0.622688	0.702702	0.292499	0.368338	0.341244		1.64668	1.58259	0.959995	0.585002	0.468005
	17.635		7.21234	3.54697	2.42674				0.595324	0.635542	0.572003	0.3744	0.337294		1.67143	1.92175	0.842412	0.533677	0.362147
	31.3947		5.65645	6.12066	1.92956				0.802928	0.636723	0.398665	0.356569	0.349663		1.49696	1.46248	0.802288	0.576517	0.425446
	29.0364		8.33199	4.34288	1.72302				0.507319	0.46429	0.417864	0.308367	0.344119		1.56825	1.85714	1.14946	0.602722	0.451587
	19.8127		7.15417	2.17277	1.65828				0.547378	0.500013	0.389999	0.357507	0.348944		0.99666	1.81998	1.02208	0.59173	0.364002
	25.5775		9.45165	3.8727	1.21836				0.640299	0.50408	0.344655	0.288268	0.414367		1.46248	1.36843	1.1375	0.546	0.364002
	26.3061		7.72127	4.02792	1.13568				0.608522	0.560783	0.442004	0.272098	0.349663		1.44182	1.53215	0.953347	0.504701	0.425446
	28.2087		6.67432	4.17269	1.90429				0.634137	0.574426	0.427746	0.411665	0.422501		1.82705	1.196	1.0852	0.389999	0.482848
	22.5095		7.92485	5.44534	2.81237				0.742861	0.56415	0.339996	0.371423	0.305223		1.72391	1.39628	0.904787	0.369471	0.346659
	20.9325		9.3644	4.34569					0.742861	0.510721	0.537925	0.389999	0.242659		1.35416	1.46959	0.835716	0.519999	0.507003
	28.5915		8.36107	3.62263					0.763041	0.519989	0.501424	0.430352	0.323422		1.99999	1.52939	0.956136	0.574729	0.492638
	30.1279		8.82639	4.33852					0.701999	0.539036	0.49028	0.389999	0.445716		1.68237	1.35653	0.974993	0.212726	0.546
	28.0115		7.75035	2.81237					0.684224	0.617508	0.442706	0.330914	0.349663		1.3553	1.75218	0.557149	0.600009	0.519999
	18.6468		6.79065	2.16809					0.773818	0.722234	0.550597	0.303341	0.376546		1.79998	1.71052	0.696421	0.389999	0.615786
	23.5698		8.39016	3.70812					0.768175	0.629032	0.548885	0.278574	0.222851		1.76431	1.71052	0.629021	0.458832	0.404452
	28.4632		8.78276	3.03264					0.776402	0.533328	0.489407	0.292499	0.365628		1.69395	1.46959	0.850922	0.268119	0.389999
	16.3126		7.53224	3.01642					0.775817	0.617508	0.28564	0.352265	0.427746		1.68237	1.63702	0.806896	0.389999	0.460905
	23.0146		8.0848	3.23575					0.667564	0.595845	0.352265	0.46313	0.402588		1.81998	1.42998	0.812496	0.371423	0.546
	32.75		9.27716	3.45322					0.709077	0.433335	0.379993	0.367057	0.308367		1.80734	1.61381	0.873609	0.49636	0.508689
	29.1884		8.62281	3.41437					0.63616	0.442556	0.367057	0.376546	0.343192		1.69205	1.70347	0.866673	0.53626	0.65001
	25.0658		7.31412	1.56					0.732722	0.380491	0.445716	0.376546	0.352265		1.40835	1.80868	0.740995	0.487493	0.411665
	30.349		8.62281	3.98658					0.715006	0.452174	0.510009	0.285995	0.468005		1.5786	1.4182	1.11429	0.519999	0.322752
	24.5022		8.18658	3.16758					0.833977	0.423249	0.431489	0.210811	0.389999		1.65254	1.77272	1.11429	0.476675	0.468005
	30.2482		9.84426	4.16192					0.59091	0.458823	0.425446	0.289708	0.325002		1.74752	1.43682	1.15557	0.501424	0.328427
	29.4852		9.27716	3.13154					0.696441	0.574426	0.472106	0.20428	0.368338		1.62499	1.86878	0.644355	0.445716	0.357507
	26.064		9.97513	5.07343					0.798796	0.60667	0.415991	0.265913	0.341244		1.75884	1.51668	0.910009	0.334292	0.230454
	26.5254		9.97513	3.35431					0.775817	0.395664	0.445716	0.308367	0.339137		1.71698	1.68237	0.845012	0.359998	0.468005
	24.8517		9.34986	4.12542					0.658016	0.513945	0.415991	0.331492	0.260001		1.79522	1.55998	0.877486	0.468005	0.633753
	31.3921		6.81973	2.55856					0.642359	0.52962	0.482848	0.295142	0.226449		1.53638	1.59543	0.989994	0.438754	0.457239
	26.5571		8.69552	2.12176					0.629901	0.661412	0.401813	0.389999	0.3744		1.36499	1.68998	0.717599	0.519999	0.569182
	30.3071		7.70673	2.3191					0.739644	0.684224	0.464291	0.539997	0.260001		1.64337	1.95	0.988006	0.78	0.512579
	30.0823		8.75368	2.50084					0.679999	0.60667	0.519999	0.550597	0.311994		1.45295	1.70625	0.744551	0.668564	0.504701
	14.0799		9.08812	4.96002					0.661812	0.649999	0.300555	0.412936	0.295858		1.58169	2.08003	0.664443	0.724288	0.542599
				3.7089					0.574426	0.633322	0.265367	0.408572	0.389999		1.73333	1.70625	0.877486	0.675991	0.445716
				4.22542					0.735834	0.462219	0.269992	0.445716	0.338005		1.58642	1.95	0.866673	0.688243	0.283635
				2.74544					0.808109	0.545989	0.190663	0.436803	0.354546		1.63257	1.58891	0.724288	0.659992	0.371423
				3.50563					0.798577	0.349988	0.460905	0.278574	0.325002		1.44446	1.44446	0.519999	0.71999	0.408572
				2.30334					0.914062	0.622911	0.329068	0.425446	0.260001		1.68998	1.77272	0.460905	0.73124	0.78
				3.85928					0.756557	0.525524	0.382354	0.451587	0.3744		1.54763	1.44446	0.530824	0.642342	0.673634
				5.21009					0.625927	0.490555	0.332457	0.357507	0.354546		1.70625	1.58439	0.499195	0.600009	0.567265
				3.16243					0.675988	0.505568	0.326185	0.458832	0.316218		1.67143	1.67915	0.742862	0.600009	0.561602
				3.43559					0.664442	0.51552	0.306889	0.389999	0.298243		1.64213	1.58891	0.682502	0.638173	0.642342
				6.45341					0.729257	0.750011	0.396008	0.445716	0.341244		1.67631	1.75001	0.78	0.701995	0.78
				2.35544					0.726456	0.742861	0.53891	0.346659	0.412936		1.76431	1.52939	0.750008	0.638173	0.910009
				2.65372					0.684224	0.679537	0.490641	0.40696	0.344119		1.82813	1.58259	0.609381	0.550597	0.642342
				3.76428					0.784489	0.682486	0.600009	0.43334	0.298243		1.73333	1.73333	0.705724	0.606667	0.891426
				3.7181					0.768175	0.649999	0.561044	0.682502	0.338005		1.64881	1.58259	0.807855	0.501424	0.633753
									0.780008	0.649999	0.581902	0.43334	0.330914		1.60789	1.73333	0.727998	0.173336	1.06363
									0.622911	0.649999	0.548885	0.43334	0.303341		1.7086	1.81998	0.974993	0.389999	0.688243
									0.726456	0.577764	0.598602	0.53626	0.144438		1.67143	1.47332	1.00286	0.567265	0.910009
									0.780008	0.480446	0.655194	0.693345	0.349663		1.79998	1.76431	0.817137	0.451587	0.65001
									0.847815	0.570741	0.49636	0.519999	0.307895		1.49116	1.76431	1.144	0.458832	0.48413
									0.754008	0.604654	0.427144	0.78	0.438754		1.74688	1.62499	1.09623	0.173336	0.542599
									0.754008	0.562156	0.329998	0.49636	0.43334		1.58891	1.35416	0.953347	0.297136	0.537925
									0.659157	0.649999	0.389999	0.585002	0.402588		1.38669	1.50002	0.935986	0.260001	0.430352
									0.732184	0.537919	0.411665	0.557149	0.292499		1.61203	1.59999	1.02959	0.250716	0.503235
									0.716662	0.581573	0.429004	0.550597	0.253949		1.59356	1.50002	1.14946	0.458832	0.49636
									0.565877	0.441518	0.456234	0.663011	0.389999		1.53215	1.64213	1.09199	0.420004	0.487493
									0.672417	0.54167	0.468005	0.533677	0.343192		1.56898	1.6095	1.05677	0.49636	0.389999
									0.795518	0.635542	0.535298	0.531821	0.329998		1.63549	1.62499	1.00286	0.539997	0.230454
									0.684224	0.478951	0.638173	0.602722	0.354546		1.39628	1.52415	0.807855	0.373044	0.376546
									0.625005	0.750011	0.538568	0.557149	0.427746		1.53638	1.48571	0.982212	0.438754	0.354546
									0.684224	0.248929	0.380482	0.476675	0.311994		1.47104	1.63702	0.94249		0.389999
									0.657475	0.664442	0.542033	0.420004	0.311994		1.45919	1.66111	0.891426		0.576517
									0.605675	0.599996	0.450932	0.492638	0.322752		1.45919	1.50314	0.887574		0.78
									0.597713	0.73332	0.504701	0.422501	0.290234		1.65688	1.38126	1.09199		0.3744
									0.780008	0.570741	0.380482	0.482848	0.292499		1.62499	1.55998	0.98348		0.468005
									0.819573	0.582771	0.481757	0.492638	0.235808		1.58366	1.47929	0.953347		0.417864
									0.497878	0.46429	0.417216	0.482848	0.267434		1.58259	1.34332	0.745332		0.260001
									0.636723	0.524997	0.471251	0.43334	0.189091		1.6033	1.3	1.13101		0.260001
									0.629677	0.525524	0.596463	0.389999	0.298243		1.49258	1.52609	1.19999		0.233996
									0.577764		0.563341	0.606667	0.260001		1.35199	1.73333	1.25273		0.227497
									0.638186		0.525008	0.468005	0.226449		1.5116	1.55998	1.31623		0.278574
									0.592992		0.539997	0.606667	0.21938		1.53638	1.42383	1.27399		0.357507
									0.596724		0.576517	0.65001	0.389999		1.63193	1.4345	1.19999		0.321174
									0.67167		0.560631	0.501424	0.232335		1.67915	1.54074	1.09838		0.569996
									0.649999		0.54363	0.389999	0.249605		1.5528	1.81998	1.30763		0.548885
									0.713736		0.539997	0.445716	0.436803		1.60233	1.71598	1.08588		0.445716
									0.663841		0.624004	0.425446	0.337294		1.58891	1.70625	1.00749		0.624004
									0.596724		0.602722	0.492638	0.303341		1.38863	1.70002	0.935986		0.561602
									0.854785		0.49636	0.507003	0.288887		1.54593	1.46959	0.94249		0.668564
									0.691484		0.63064	0.389999	0.337294		1.59714	1.4345	0.881754		0.600009
									0.702702		0.574729	0.519999	0.417864		1.56898	1.40835	1.0174		0.569996
									0.677458		0.458832	0.438754	0.435874		1.54763	1.59999	1.11429		0.567265
									0.791314		0.633753	0.487493	0.427144		1.62499	1.58439	1.43003		0.574729
									0.702702		0.3744	0.600009	0.377419		1.69658	1.52286	1.18559		0.542599
									0.928582		0.65001	0.468005	0.389999		1.60789	1.62499	1.08645		0.430352
									0.711906		0.498332	0.43334	0.3744		1.60726	1.63702	0.968289		0.642342
									0.731257		0.471622	0.389999	0.304392		1.55434	1.67915	1.15145		0.519999
									0.686805		0.502676	0.415991	0.365628		1.81315	1.53334	0.947158		0.531821
									0.683065		0.353594	0.468005	0.468005		1.6865	1.60588	1.15557		0.585002
									0.717905		0.519999	0.40696	0.3744		1.7086	1.79998	1.14705		0.546
									0.678266		0.323422	0.180005	0.567265		1.74688	1.64213	0.930953		0.550597
									0.675008		0.468005	0.201286	0.519999		1.73333	1.58891	0.756374		0.642342
									0.678266		0.407722	0.519999	0.298727		1.86337	1.56898	0.981297		0.561602
									0.713736		0.420004	0.468005	0.334292		1.55998	1.69566	1.00749		0.678259
									0.701999		0.435874	0.487493	0.617489		1.6095	1.50968	1.38665		0.480009
									0.649999		0.429004	0.260001	0.464291		1.3975	1.64414	1.06738		0.408572
									0.660327		0.468005	0.539997	0.349663		1.22974	1.59999	0.995164		0.093603
									0.649999		0.544176	0.519999	0.378176		1.55159	1.58891	1.29001		0.232335
									0.634895		0.464291	0.557149	0.417864		1.36666	1.35199	1.02817		0.272098
									0.616952		0.417216	0.408572	0.404452		1.53334	0.966663	1.13453		0.189091
									0.570173		0.346659	0.501424	0.430352		1.49696	1.19165	1.19292		0.283635
									0.610598		0.421621	0.596463	0.3744		1.43682		1.144		0.129995
									0.642698		0.211249	0.550597	0.301931		1.51668		0.953347		0.468005
									0.527717		0.292499	0.557149	0.487493		1.33095		0.747497		0.207994
									0.553183		0.365628	0.542599	0.354546		1.84519		0.898173		0.242062
									0.503219		0.519999	0.624004	0.266339		1.51668		0.422501		0.436803
									0.770381		0.389999		0.408572		1.38669		0.585002		0.194996
									0.614868		0.504701		0.278574		1.3		0.705724		0.272999
									0.674691		0.454992		0.306433		1.12896		0.530406		0.519999
									0.573233		0.339672		0.606667		1.22352		0.684499		0.688243
									0.517464		0.316218		0.519999		1.32132		0.644355		0.624004
									0.506326		0.288887		0.389999		1.25667		0.713137		0.445716
									0.577764		0.247311		0.305223		1.40835		0.594287		0.389999
									0.739223		0.348503		0.450007		1.13999		0.557149		0.373044
									0.638975		0.311994		0.339137		1.3		0.668564		0.339137
									0.700007		0.334292		0.462228		1.38126		0.668564		0.440872
									0.701999		0.423435		0.3744		1.45602		0.722212		0.451587
									0.549302		0.49028		0.377419		1.3		0.573533		0.410534
									0.577764		0.322178		0.298727		1.34817		0.585002		0.531821
									0.56666		0.308367		0.238783		1.5213		0.600009		0.389999
									0.685441		0.357507		0.401813		1.20369		0.78		0.267434
									0.866664		0.42679		0.330914		1.84164		0.695688		0.468005
									0.768175		0.417864		0.378176		1.5108		0.78		0.546
									0.771178		0.410534		0.185707		1.67143		0.600009		0.492638
									0.76472		0.354546		0.343192		1.53334		0.503235		0.295858
									0.731257		0.412083		0.435874		1.66668		0.497872		0.334292
									0.67167		0.341244		0.321174		1.73333		0.597996
									0.680953		0.379168		0.474788		1.62499		0.63001
									0.829308		0.348944		0.454992		1.54074		0.78
									0.631442		0.278574		0.440872		1.71362		0.682502
									0.712909		0.297822		0.533677		1.73333		0.794704
									0.597301		0.301603		0.389999		1.6972		0.798152
									0.649999		0.360758		0.287371		1.8515		0.611774
									0.701999		0.438754		0.40345		1.69303		0.532679
									0.613203		0.339137		0.362147		1.65748		0.686405
									0.669688		0.323996		0.519999		1.6774		0.658125
									0.557154		0.460336		0.440872		1.81074		0.760002
									0.795923		0.302448		0.435874		1.59248		0.716744
									0.756375		0.24375		0.487493		1.82705		0.887574
									0.700007		0.411665		0.331492		1.42498		0.752632
									0.742861		0.303341		0.216665		1.49258		0.78
									0.622911		0.256572		0.152196		1.42189		0.78
									0.685122		0.282125		0.404452		1.6033		0.87177
									0.698135		0.150967		0.19953		1.6774		0.78
									0.707341		0.293773		0.212726		1.42189		0.690863
									0.611761		0.385178		0.369471		1.6656		0.827745
									0.733858		0.348503		0.246322		1.52415		1.03352
									0.715952		0.351545		0.414367		1.48571		0.906962
									0.60938		0.307266		0.301368		1.46773		0.714989
									0.745904		0.356289		0.371423		1.62499		0.817137
									0.760389		0.377806		0.327097		1.54528		0.935986
									0.687153		0.361468		0.364002		1.44446		0.682502
									0.557154		0.457239		0.352265		1.43929		0.901887
									0.661812		0.47806		0.440872		1.49833		0.794177
									0.771178		0.436803		0.278574		1.54895		0.63064
									0.719149		0.537925		0.389999		1.4182		0.67499
									0.815267		0.443174		0.271304		1.64414		0.635563
									0.649999		0.502676		0.317772		1.63549		0.567265
									0.588093		0.489767		0.493992		1.65456		0.567265
									0.632901		0.425446		0.132459		1.55998		0.877486
									0.614285		0.389999		0.362147		1.47332		0.953347
									0.620904		0.370505		0.226449		1.59248		0.828759
									0.60667		0.439992		0.289708		1.45688		0.862093
									0.856086		0.425446		0.292499		1.50394		0.78
									0.768175		0.481757		0.352265		1.54763		0.760984
									0.7511		0.389999		0.253498		1.7432		0.835716
									0.681965		0.460905				1.49622		0.866673
									0.557154		0.431792				1.53112		0.94249
									0.835707		0.435356				1.65688		0.904787
									0.856086		0.49028				1.64668		0.877486
									0.90605		0.421973				1.53638		0.804364
									0.827267		0.515097				1.5213		0.910009
									0.905342		0.380482				1.58891		0.92183
									0.815678		0.505551				1.58535		0.850922
									0.789294		0.438754				1.71598		0.799017
									0.7694		0.397962				1.3		1.00286
									0.742861		0.383808				1.57574		0.760002
									0.766676		0.3744				1.70002		0.799491
									0.754827		0.429571				1.45852		0.759471
									0.853129		0.343728				1.66668		0.838881
									0.819573		0.420004				1.6178		0.845012
									1.02789		0.389999				1.73333		0.953347
									0.866664						1.56981		1.00286
									0.812488						2.00573		0.940583
									0.742861						1.86337		1.01832
									0.829787						1.86878		1.03434
									0.89253						2.18216		0.801672
									0.831992						1.71934		0.585002
									0.755829						1.5786
									0.887798						2.0719
									0.923691						2.04847
									0.983789						1.79998
									0.673223						1.73333
									0.742861						1.69395
									0.760968						1.88277
									0.789294						2.21766
									0.729257						1.73333
									0.759994						2.00911
									0.739223						1.76431
									0.698135						1.79707
									0.631947						1.70625
									0.700007						1.45474
									0.649999						1.3975
									0.679104						1.49622
									0.731257						1.55998
									0.7694						1.80868
									0.661012						1.4978
									0.689797						1.64491
									0.604654						1.57501
									0.833977						1.55998
									0.818527						1.59999
									0.838724						1.86219
									0.866664						2.01721
									0.774986						1.7815
									0.911928						2.1185

## Sheet: Figure 3I
	Figure 3I	Anterograde and retrograde IFT velocities versus cilia length.
	Antero							Retro
	cilia length	crista	neuromast	spinal cord	epidermal cell	pronephric duct		cilia length	crista	neuromast	spinal cord	epidermal cell	pronephric duct
	27.7079	1.5721						27.7079	0.658672
	27.7079	1.58259						27.7079	0.52703
	27.7079	1.3975						27.7079	0.7511
	17.4751	2.13871						17.4751	0.561375
	17.4751	1.60726						17.4751	0.591622
	17.4751	1.75141						17.4751	0.724998
	25.5203	1.7112						25.5203	0.610432
	25.5203	1.64002						25.5203	0.611318
	25.5203	1.86448						25.5203	0.591869
	29.6959	1.70538						29.6959	0.653946
	29.6959	1.80761						29.6959	0.706048
	29.6959	1.55998						29.6959	0.664614
	12.9948	1.49696						12.9948	0.658672
	12.9948	1.49258						12.9948	0.592225
	12.9948	1.41607						12.9948	0.788735
	17.349	1.87262						17.349	0.671526
	17.349	1.81074						17.349	0.717787
	17.349	2.19372						17.349	0.663841
	28.6949	1.66668						28.6949	0.654315
	28.6949	1.79245						28.6949	0.633042
	28.6949	1.7627						28.6949	0.821064
	24.5284	1.71052						24.5284	0.655965
	24.5284	1.68571						24.5284	0.59091
	24.5284	1.66111						24.5284	0.52962
	13.8754	1.70236						13.8754	0.543882
	13.8754	1.75001						13.8754	0.54167
	13.8754	1.8023						13.8754	0.571987
	23.9049	1.57529						23.9049	0.631779
	23.9049	1.66398						23.9049	0.605924
	23.9049	1.71934						23.9049	0.725593
	16.7736		1.49622					16.7736		0.526581
	16.7736		1.68998					16.7736		0.664127
	16.7736		1.50527					16.7736		0.661812
	19.136		1.86081					19.136		0.457751
	19.136		1.58676					19.136		0.501889
	19.136		1.49833					19.136		0.415583
	18.668		1.89427					18.668		0.662497
	18.668		1.65956					18.668		0.669688
	18.668		1.66279					18.668		0.426714
	12.963		1.6033					12.963		0.669688
	18.2669		1.58259					18.2669		0.631442
	13.2999		1.92175					13.2999		0.611761
	18.9746		1.46248					18.9746		0.679537
	11.822		1.85714					11.822		0.599996
	18.7665		1.81998					18.7665		0.602447
	18.6756		1.36843					18.6756		0.668568
	18.2771		1.53215					18.2771		0.812488
	14.443		1.196					14.443		0.551523
	14.1794		1.39628					14.1794		0.67098
	14.3335		1.46959					14.3335		0.686108
	9.64579		1.52939					9.64579		0.452174
	16.8191		1.35653					16.8191		0.674086
	14.6589		1.75218					14.6589		0.702702
	20.3029		1.71052					20.3029		0.635542
	20.5987		1.71052					20.5987		0.636723
	18.8931		1.46959					18.8931		0.46429
	13.3416		1.63702					13.3416		0.500013
	9.26301		1.42998					9.26301		0.50408
	15.196		1.61381					15.196		0.560783
	15.8007		1.67143					15.8007		0.618036
	3.05183			0.389999				3.05183			0.510009
	2.58227			0.65001				2.58227			0.468005
	5.39963			0.825895				5.39963			0.519999
	2.24983			0.473576				2.24983			0.491116
	3.1395			0.569996				3.1395			0.462228
	5.44783			0.688243				5.44783			0.40696
	5.23224			0.567265				5.23224			0.337294
	5.77153			0.474788				5.77153			0.450007
	3.9454			0.378176				3.9454			0.499195
	2.24203			0.389999				2.24203			0.427746
	4.74802			0.260001				4.74802			0.311994
	3.33606			0.389999				3.33606			0.341244
	3.24012			0.40345				3.24012			0.337294
	3.22639			0.317772				3.22639			0.349663
	3.55742			0.402588				3.55742			0.344119
	2.5155			0.357507				2.5155			0.348944
	2.496			0.65001				2.496			0.414367
	3.09644			0.519999				3.09644			0.349663
	3.6206			0.492638				3.6206			0.422501
	3.2863			0.373044				3.2863			0.305223
	2.08135			0.468005				2.08135			0.242659
	1.83331			0.362147				1.83331			0.323422
	2.13049			0.425446				2.13049			0.445716
	2.82532			0.451587				2.82532			0.349663
	3.57521			0.364002				3.57521			0.376546
	2.23361			0.364002				2.23361			0.222851
	4.24616			0.425446				4.24616			0.365628
	2.57275			0.482848				2.57275			0.427746
	3.69392			0.346659				3.69392			0.402588
	3.97722			0.507003				3.97722			0.308367
	1.87855				0.519999			1.87855				0.357507
	1.12492				0.633753			1.12492				0.288268
	2.09882				0.49636			2.09882				0.272098
	1.1881				0.458832			1.1881				0.411665
	2.86806				0.451587			2.86806				0.371423
	2.09882				0.585002			2.09882				0.389999
	2.38633				0.533677			2.38633				0.430352
	1.74408				0.576517			1.74408				0.389999
	1.62864				0.602722			1.62864				0.330914
	1.404				0.59173			1.404				0.303341
	0.9867				0.546			0.9867				0.278574
	2.12176				0.504701			2.12176				0.292499
	2.5155				0.389999			2.5155				0.352265
	2.57275				0.369471			2.57275				0.46313
	1.99774				0.519999			1.99774				0.367057
	1.4717				0.574729			1.4717				0.376546
	1.77871				0.212726			1.77871				0.376546
	2.27245				0.600009			2.27245				0.285995
	1.4717				0.389999			1.4717				0.210811
	2.45372				0.458832			2.45372				0.289708
	1.4717				0.268119			1.4717				0.20428
	1.90429				0.389999			1.90429				0.265913
	2.03393				0.371423			2.03393				0.308367
	1.68012				0.49636			1.68012				0.331492
	1.53644				0.53626			1.53644				0.295142
	1.81927				0.487493			1.81927				0.389999
	2.0929				0.519999			2.0929				0.539997
	1.33286				0.476675			1.33286				0.550597
	1.41258				0.501424			1.41258				0.412936
	2.61503				0.445716			2.61503				0.408572
	6.87789					0.887574		6.87789					0.354546
	5.94727					0.808899		5.94727					0.323422
	6.79065					0.847828		6.79065					0.351004
	6.47074					0.959995		6.47074					0.468005
	8.05571					0.842412		8.05571					0.553539
	4.84215					0.802288		4.84215					0.376546
	8.84093					1.14946		8.84093					0.435356
	10.1642					1.02208		10.1642					0.334292
	4.9294					1.1375		4.9294					0.292499
	8.78276					0.953347		8.78276					0.572003
	7.05239					1.0852		7.05239					0.398665
	9.59706					0.904787		9.59706					0.417864
	8.65189					0.835716		8.65189					0.389999
	8.14296					0.956136		8.14296					0.344655
	7.88122					0.974993		7.88122					0.442004
	8.88455					0.557149		8.88455					0.427746
	7.69219					0.696421		7.69219					0.339996
	7.64857					0.629021		7.64857					0.537925
	8.78276					0.850922		8.78276					0.501424
	4.49317					0.806896		4.49317					0.49028
	10.7749					0.812496		10.7749					0.442706
	7.28504					0.873609		7.28504					0.550597
	7.99755					0.866673		7.99755					0.548885
	8.39016					0.740995		8.39016					0.489407
	8.0848					1.11429		8.0848					0.28564
	10.5859					1.11429		10.5859					0.352265
	7.5177					1.15557		7.5177					0.379993
	6.1363					0.644355		6.1363					0.367057
	6.93606					0.910009		6.93606					0.445716
	7.5177					0.845012		7.5177					0.510009

## Sheet: Figure 3J
	Figure 3J	Frequency of anterograde and retrograde IFT entering or exiting cilia.
	4dpf crista antero	4dpf crista retro	4dpf neuromast antero	4dpf neuromast retro	30hpf kidney antero	30hpf kidney retro	30hpf neural tube antero	30hpf neural tube retro	30hpf skin antero	30hpf skin retro
	0.25	0.525	0.225	0.35	0.175	0.225	0.125	0.075	0.1	0.075
	0.275	0.375	0.175	0.35	0.2	0.25	0.1	0.125	0.125	0.1
	0.275	0.325	0.15	0.3	0.2	0.275	0.1	0.125	0.05	0.075
	0.225	0.35	0.15	0.275	0.125	0.225	0.125	0.15	0.125	0.125
	0.275	0.475	0.175	0.45	0.15	0.175	0.1	0.075	0.15	0.175
	0.3	0.55	0.15	0.3	0.15	0.175	0.125	0.125	0.15	0.1
	0.325	0.5	0.2	0.425	0.125	0.225	0.075	0.1	0.075	0.1
	0.3	0.5	0.225	0.375	0.15	0.25	0.075	0.1	0.075	0.075
	0.175	0.4	0.2	0.3	0.2	0.3	0.2	0.175	0.15	0.2
	0.275	0.375	0.25	0.45	0.1	0.2	0.125	0.2	0.175	0.2
	0.175	0.45	0.175	0.35	0.125	0.2	0.125	0.2	0.125	0.15
	0.275	0.5	0.2	0.375	0.1	0.2	0.15	0.125	0.1	0.1
	0.175	0.375	0.225	0.4	0.15	0.175	0.175	0.25	0.1	0.075
	0.2	0.425	0.175	0.425	0.15	0.2	0.175	0.15	0.075	0.075
	0.2	0.4	0.25	0.45	0.125	0.25	0.2	0.175	0.125	0.075
	0.25	0.45	0.275	0.5	0.125	0.2	0.15	0.175	0.075	0.05
	0.2	0.25	0.25	0.375	0.15	0.225	0.225	0.25	0.1	0.05
	0.3	0.4	0.15	0.375	0.1	0.25	0.125	0.1	0.15	0.2
	0.25	0.4	0.225	0.3	0.15	0.225	0.1	0.15	0.2	0.2
	0.275	0.475	0.25	0.425	0.15	0.175	0.125	0.15	0.175	0.2
	0.15	0.275	0.2	0.3	0.125	0.15	0.1	0.1	0.15	0.175
	0.3	0.475	0.25	0.525	0.15	0.2	0.125	0.15	0.1	0.125
	0.15	0.3	0.175	0.35	0.175	0.2	0.175	0.125	0.125	0.175
	0.2	0.4	0.175	0.375	0.175	0.25	0.125	0.125	0.15	0.175
	0.175	0.3	0.175	0.375	0.125	0.175	0.1	0.15	0.175	0.275
	0.3	0.425	0.25	0.425	0.15	0.2	0.1	0.15	0.2	0.15
	0.3	0.5	0.175	0.4	0.1	0.175	0.125	0.15
	0.25	0.5	0.25	0.4	0.125	0.175
	0.25	0.425	0.175	0.35	0.125	0.175
	0.2	0.425	0.15	0.4	0.15	0.225
	0.2	0.3	0.25	0.475	0.125	0.125
	0.15	0.225			0.15	0.225
	0.175	0.45			0.25	0.35
	0.225	0.425			0.2	0.275
	0.3	0.375			0.125	0.275
	0.375	0.55			0.25	0.4
	0.325	0.425			0.175	0.3
	0.2	0.45			0.175	0.3
	0.225	0.35			0.2	0.25
	0.25	0.525			0.15	0.25
	0.2	0.45			0.125	0.2
	0.3	0.6			0.175	0.25
	0.25	0.425			0.15	0.25
	0.225	0.45
	0.225	0.4
	0.225	0.5
	0.35	0.525
