# Supplementary material for: Ciliary length regulation by intraflagellar transport in zebrafish
Source: eLife. 2024 Dec 13;13:RP93168. doi: 10.7554/eLife.93168 (PMC11643619; doi:10.7554/eLife.93168)
Supplement: Figure 4—figure supplement 1—source data 1. [file elife-93168-fig4-figsupp1-data1.xlsx]

## Sheet: Figure 4-figure supplement 1B
	Figure 4-figure supplement 1B			Anterograde and retrograde IFT velocity in neuromast cilia in control and mutants.
	ctr antero	kif17 antero	bbs4 antero	ctr retro	kif17 retro	bbs4 retro
	0.680096	0.524661	0.60724	1.47454	1.23878	1.08817
	0.68759	0.643266	0.596518	1.41576	1.32134	1.1659
	0.757839	0.567993	0.693225	1.58561	1.6193	1.39906
	0.651519	0.851998	0.675006	1.56948	1.37162	1.28861
	0.660683	0.604552	0.709687	1.51565	1.1659	0.993171
	0.404504	0.601765	0.60944	1.66557	1.34529	1.1659
	0.499682	0.655825	0.534382	1.50594	1.39906	0.920442
	0.661731	0.565275	0.655825	1.39906	1.70998	1.04097
	0.595902	0.494631	0.604552	1.6221	1.64289	1.1659
	0.46635	0.557605	0.529956	1.81364	1.47274	1.28861
	0.838	0.461494	0.582949	1.38799	1.23878	1.55453
	0.705677	0.46635	0.522656	1.69057	1.28248	1.1659
	0.804061	0.490913	0.46635	1.3779	0.932726	1.55453
	0.680096	0.511867	0.493263	1.58231	1.45737	1.53897
	0.816129	0.598702	0.524661	0.983729	1.49901	1.77951
	0.709687	0.566307	0.514369	1.51565	1.49901	1.30042
	0.688935	0.541317	0.514369	1.21889	1.26728	1.48388
	0.623998	0.503468	0.635933	1.27696	1.55453	1.1659
	0.567187	0.518166	0.567187	1.30042	1.47979	1.0645
	0.699547	0.474988	0.595364	1.30582	1.49901	1.1659
	0.529956	0.422142	0.582949	1.12272	1.36023	1.03266
	0.505231	0.369196	0.541317	1.36023	1.27191	1.23878
	0.433038	0.437212	0.418532	1.49901	1.32134	1.57741
	0.388635	0.569983	0.379589	1.58985	1.33245	1.48976
	0.485795	0.627799	0.57195	1.34254	1.58985	1.57396
	0.456231	0.597906	0.494631	1.43495	1.36693	1.49234
	0.456231	0.440441	0.762333	1.33245	1.27521	1.27191
	0.619372	0.496121	0.370965	1.29082	1.32488	1.23878
	0.55381	0.600607	0.428297	1.22727	1.45737	1.43495
	0.532978	0.582949	0.529956	1.59545	1.11039	1.27191
	0.534382	0.437212	0.56284	1.34079	1.1659	1.32134
	0.631531	0.615334	0.478313	1.41934	1.30582	1.1659
	0.536303	0.565275	0.604552	1.29082	1.20476	1.21074
	0.661731	0.514369	0.600607	1.30042	1.28861	1.41134
	0.443046	0.490913	0.73839	1.41576	1.58231	1.3779
	0.694575	0.54652	0.508763	1.30042	1.43495	1.39906
	0.396904	0.652908	0.556456	1.58985	1.57143	1.27696
	0.555182	0.566307	0.676963	1.66557	1.65167	1.45737
	0.477837	0.472665	0.370965	1.6193	1.39906	1.41134
	0.527429	0.445797	0.499682	1.57741	1.50594	1.50883
	0.44652	0.499682	0.460224	1.48388	1.64599	1.48976
	0.643266	0.473637	0.567187	1.36023	1.38799	1.29545
	0.524661	0.40553	0.433038	1.41576	1.55453	1.04317
	0.61071	0.627799	0.490913	1.31536	1.53407	1.49901
	0.565275	0.46635	0.541317	1.41319	1.0762	1.27191
	0.6246	0.518166	0.54652	1.42501	1.45737	1.1659
	0.377205	0.571522	0.485795	1.1326	1.50883	1.04317
	0.582949	0.605378	0.647733	1.24364	1.3845	1.6193
	0.340049	0.428297	0.631531	1.50594	2.04032	1.1076
	0.411493	0.495496	0.604552	1.50594	1.81364	1.36023
	0.431812	0.429545	0.506924	1.54065	1.58231	1.32134
	0.461494	0.56284	0.459284	1.57143	1.94315	1.57396
	0.518166	0.510072	0.423961	1.48976	1.34079	1.39906
	0.353294	0.46635	0.544089	1.44347	1.47681	1.63224
	0.426013	0.524661	0.666232	1.49901	1.49901	1.71454
	0.595364	0.518166	0.651519	1.68409	1.7766	1.38799
	0.514369	0.502936	0.651519	1.70403	1.60313	1.21252
	0.555182	0.619372	0.582949	1.70403	1.27191	1.41134
	0.644966	0.388635	0.514369	1.53897	1.34079	1.1659
	0.620155	0.433038	0.632927	1.44347	1.74885	1.26728
	0.433826	0.567187	0.444142	1.52466	1.43495	1.58985
	0.475866	0.437212	0.349765	1.64599	1.41576	1.2166
	0.444142	0.582949	0.433038	1.63224	0.971598	1.43495
	0.377205	0.527429	0.482431	1.64088	1.39906	1.20754
	0.518166	0.416397	0.547265	1.48976	1.1659	1.22141
		0.388635	0.582949	1.61004	1.39906	1.1659
		0.504167	0.671289	1.41934	1.45737	1.72112
		0.541317	0.728677	1.48388	1.71815	1.53024
		0.495496	0.536303	1.36023	1.51133	1.39906
		0.652908	0.582949	1.74885	1.30042	1.11521
		0.613643	0.582949	1.33862	1.3741	1.47274
		0.461494	0.604552	1.53407	1.34079	1.25558
		0.529956	0.635933	1.35395	1.24364	1.52075
		0.6218	0.647733	1.38181	1.74885	1.25919
		0.510072	0.601765	1.53407	1.70403	1.36867
		0.504167	0.598702	1.47682	1.11521	1.07263
		0.356251	0.709687	1.33245	1.32134	1.08262
		0.366422	0.643266	1.31162	1.23878	1.1659
		0.358745	0.433826	1.55453	1.10454	1.39906
		0.46635	0.490913	1.47274	1.1659	1.3072
		0.341242	0.338482	1.44347	1.52075	1.42501
		0.423961	0.402043	1.67889	1.45737	1.57396
		0.377205	0.526546	1.28653	1.40713	1.318
		0.485795	0.461494	1.57741	1.39906	1.49234
		0.473637	0.552264	1.39906	1.49901	1.3845
		0.380174	0.598702	1.1659	1.1659	1.34999
		0.488926	0.540303		1.1659	1.10454
		0.496121	0.518166		1.53024	1.48388
		0.488041	0.518166		1.53024	1.74885
		0.582949	0.402043		1.03637	1.36023
		0.582949	0.413715		1.74885	1.24918
		0.627799	0.518166		1.28861	1.22141
		0.522656	0.564145		1.1659	1.55453
		0.544089	0.544089		1.68409	1.42501
		0.565275	0.565275		1.58231	1.04317
		0.714577	0.55381		1.68409	1.23878
		0.437212	0.545751		1.53024	1.21889
		0.472665	0.582949		1.3779	1.22419
		0.529956	0.532978		1.81364	1.50594
		0.514369	0.485795		1.29545	1.74885
		0.377205	0.548656		1.318	1.35242
		0.480073	0.661731		1.21252	1.47681
		0.494631	0.582949		1.63224	1.39906
		0.456231	0.535687		1.42501	1.57396
		0.538104	0.839452		1.33245	1.63224
		0.582949	0.46635		1.47005	1.22419
		0.61071	0.427489		1.29545	1.57143
		0.474988	0.582949		1.26728	1.47005
		0.237947	0.559632		1.30042	1.59545
		0.456231	0.485795		1.32669	1.65167
		0.557605	0.625595		1.1659	1.45737
		0.582949	0.423961		1.24112	1.64599
		0.567993	0.483432		1.63224	1.43495
		0.548656	0.526546		1.77951	1.21889
		0.552264	0.619372		1.69057	1.68409
		0.604552	0.55381		1.60814	1.52466
		0.529956	0.454988		1.53897	1.04317
		0.552264	0.408064		1.55453	1.38799
		0.480073	0.535687		1.44734	1.30582
		0.495496	0.520921		1.66557	1.23066
		0.566307	0.503468		1.65167	1.43495
		0.615334	0.510072		1.78774	1.43086
		0.608301	0.421015		1.29545	1.27191
		0.474988	0.483432		1.38799	1.38799
		0.505231	0.562137		1.11732	1.45737
		0.408064	0.611618		1.31162	1.24364
			0.690033		1.41134	1.38647
			0.627799		1.47274	1.59545
			0.437212		1.36867	1.28248
			0.476958		1.27696	1.45737
			0.632927		1.42501
			0.693996		1.80186
			0.818618		1.83214
			0.73839		1.52466
					1.3779
					1.22419
					1.0493
					1.24112
					1.26582
					1.22141
					1.29545
					1.04097
					1.39906
					1.39906
