# Supplementary material for: Ciliary length regulation by intraflagellar transport in zebrafish
Source: eLife. 2024 Dec 13;13:RP93168. doi: 10.7554/eLife.93168 (PMC11643619; doi:10.7554/eLife.93168)
Supplement: Figure 4—figure supplement 2—source data 1. [file elife-93168-fig4-figsupp2-data1.xlsx]

## Sheet: Figure 4-figure supplement 2E
	Figure 4-figure supplement 2E			Beating frequency of cilia in pronephric duct of wild type and ttll3 mutant
	wt	ttll3
	64	46
	44	52
	52	48
	58	41
	48	42
	59	45
	36	44
	63	57
	41	53
	43	60
	42

## Sheet: Figure 4-figure supplement 2F
	Figure 4-figure supplement 2F			Fertilization rate of wild type and ttll3 mutant
	WT	ttll3
	100	85.4
	69.1	98.8
	95.4	100
	76.87	100
	86.12	96.89
	98.37	74.15
	84.8	78.11
