# Supplementary material for: Ciliary length regulation by intraflagellar transport in zebrafish
Source: eLife. 2024 Dec 13;13:RP93168. doi: 10.7554/eLife.93168 (PMC11643619; doi:10.7554/eLife.93168)
Supplement: Figure 4—figure supplement 4—source data 1. [file elife-93168-fig4-figsupp4-data1.xlsx]

## Sheet: Figure 4-figure supplement 4 
	Figure 4-figure supplement 4			Relative fluorescence intensity in cilia of crista and epidermal cells.
	crista	epidermal cell
	8.79078	4.61774
	2.08774	5.45391
	4.15658	3.12111
	4.10905	3.71548
	3.00105	3.10551
	3.7774	4.43016
	4.14124	3.14153
	2.67706	3.26293
	2.19876	3.77425
	2.70896	3.63845
	5.26302	3.79072
	4.18138	4.16291
	4.58794	4.33169
	3.42827	4.04815
	3.95168	4.66699
	2.46476	5.0873
	3.43363	2.79887
	4.08575	3.76851
	4.11838	3.57323
	4.5255	5.2733
	4.13028	4.16924
	5.22157
