# Supplementary material for: Ciliary length regulation by intraflagellar transport in zebrafish
Source: eLife. 2024 Dec 13;13:RP93168. doi: 10.7554/eLife.93168 (PMC11643619; doi:10.7554/eLife.93168)
Supplement: Figure 4—source data 1. [file elife-93168-fig4-data1.xlsx]

## Sheet: Figure 4B
	Figure 4B	Anterograde and retrograde IFT velocity in crista cilia of control or mutant larvae.
	ctr antero	kif3b antero	kif17 antero	bbs4 antero	ctr retro	kif3b retro	kif17 retro	bbs4 retro
	0.722771	0.797401	0.530232	0.479262	1.66268	1.84369	1.61564	0.809104
	0.72779	0.672699	0.632405	0.58816	1.50263	1.87959	1.72367	1.31
	0.744305	0.637289	0.663509	0.6238	1.39189	1.965	1.51471	1.08219
	0.754257	0.672699	0.748575	0.731174	1.27032	1.965	1.57198	1.39189
	1.02245	0.654999	0.641621	0.512619	1.66729	1.79035	1.8069	1.36458
	0.740438	0.795366	0.579828	0.548361	1.83398	1.8558	1.67137	1.36696
	0.808283	0.748575	0.620521	0.56849	1.44787	1.82259	1.8411	1.50406
	0.816387	0.708108	0.682292	0.672699	1.65678	1.68429	1.78309	1.56192
	0.926022	0.795366	0.553123	0.571018	1.51156	2.04359	1.77483	1.45036
	0.82738	0.836943	0.849067	0.689487	1.51685	1.83398	1.93384	1.40358
	0.689487	0.654999	0.584812	0.626523	1.63749	1.99618	1.91042	1.35366
	0.654999	0.821953	0.654999	0.500895	1.965	1.63749	1.91464	1.83398
	0.860869	0.780948	0.423826	0.446598	1.02245	1.7703	1.965	1.49714
	0.72779	0.916999	0.516049	0.639015	0.993804	1.77483	1.9388	1.35224
	0.916999	0.778904	0.654999	0.598051	0.854337	1.47373	1.72367	1.42911
	0.822558	0.759808	0.635141	0.764153	1.76173	1.35092	1.74666	1.31
	0.368446	0.913937	0.577943	0.683484	1.63749	2.31768	1.60771	1.76565
	0.436668	0.714532	0.676141	0.368446	1.56352	1.74666	1.81944	1.72918
	0.436668	0.736882	0.56144	0.691386	1.84744	1.54514	1.83398	1.53587
	0.422588	0.673711	0.696803	0.500188	1.75917	1.50847	1.51156	1.46115
	0.703505	0.824823	0.500895	0.873331	1.68429	1.43478	1.92406	1.58577
	0.639779	0.744305	0.564311	0.714532	1.67558	1.83398	1.76173	1.41919
	0.669553	0.903439	0.644912	0.678401	1.31	1.55259	1.81382	1.31
	0.822558	0.916999	0.556737	0.604611	1.58104	2.02456	2.04689	1.41076
	0.723427	0.738027	0.577943	0.654999	1.40825	1.60113	1.83398	1.31
	0.735438	0.764153	0.485962	0.509457	1.80903	1.60113	1.93384	1.31
	0.684328	0.714532	0.574559	0.800569	1.59074	1.60582	1.87959	1.53783
	0.703505	0.711154	0.554228	0.70018	1.59658	1.31	1.965	1.70871
	0.604611	0.83363	0.56144	0.609833	1.64808	1.27147	2.0863	1.45036
	0.64389	0.828372	0.613203	0.674839	1.67841	1.93654	2.1436	1.81709
	0.701798	0.736882	0.61792	0.701798	1.78309	1.91931	1.7268	1.92406
	0.698652	0.53743	0.556737	0.774084	1.62623	1.80903	1.70698	1.31
	0.654999	0.752037	0.604611	0.74234	1.63749	1.8411	1.65062	1.94245
	0.67426	0.732044	0.654999	0.714532	1.63749	1.78635	1.76347	1.68429
	0.643095	0.724681	0.756878	0.654999	1.46115	1.93654	1.82467	1.7131
	0.6802	0.740438	0.614904	0.607082	1.48465	1.63749	1.63749	1.63749
	0.673711	0.667363	0.748575	0.689487	1.27259	1.78381	1.88793	1.18322
	0.57023	0.676836	0.714532	0.598852	1.63749	1.88316	1.56192	1.48089
	0.60611	0.809104	0.627703	0.701798	1.84943	1.8069	2.0378	1.68429
	0.611336	0.721459	0.578844	0.554228	1.69207	2.17084	1.70021	1.5065
	0.494329	0.734867	0.41274	0.598852	1.83398	2.06846	1.6123	1.31
	0.643521	0.578844	0.556737	0.538045	1.81944	2.00349	1.61564	1.7131
	0.732044	0.759808	0.577943	0.701798	1.92406	1.89725	1.64808	1.68429
	0.790929	0.786008	0.595456	0.601896	1.7131	1.72367	1.87651	1.47373
	0.679272	0.752037	0.675476	0.545837	2.08783	1.88793	1.66268	1.58577
	0.616467	0.952714	0.664486	0.711154	1.6123	1.98929	1.93523	1.24763
	0.678401	0.711953	0.668948	0.64043	1.50263	1.84219	1.90884	1.31
	0.629813	0.654999	0.618619	0.601896	1.40358	1.76173	1.965	1.46115
	0.776307	0.663969	0.565097	0.56144	1.54115	1.46233	1.86422	1.5482
	0.730155	0.789868	0.582209	0.575132	1.70698	1.60582	1.99778	1.36458
	0.654999	0.722771	0.576387	0.638194	1.70297	1.965	1.73383	1.83398
	0.569577	0.736882	0.6238	0.619262	1.91042	1.76849	1.84943	1.59074
	0.56849	0.748575	0.443385	0.633871	1.7131	1.87847	1.57198	1.65174
	0.597554	0.668948	0.499036	0.670967	1.89223	1.87143	1.92132	1.53783
	0.769372	0.564663	0.633166	0.539408	1.74666	2.02116	1.83398	1.7268
	0.654999	0.586046	0.6363	0.535908	1.7268	1.80564	1.72367	1.52835
	0.6802	0.764153	0.599488	0.654999	1.74666	1.72812	1.51685	1.31
	0.56144	0.797401	0.576387	0.654999	1.83398	1.73257	1.67023	1.23293
	0.436668	0.751641	0.535908	0.446598	1.8521	1.62867	1.60113	1.31
	0.547824	0.963241	0.556737	0.604611	1.64961	1.65934	1.56563	1.42911
	0.693521	0.83363	0.476361	0.639015	1.74666	1.91708	1.7703	1.45557
	0.626523	0.79878	0.511222	0.445399	1.40358	1.93384	1.66268	1.49067
	0.654999	0.723935	0.511222	0.530232	1.65174	1.94384	1.63749	1.22266
	0.654999	0.50709	0.569577	0.616467	1.49067	1.31	1.57198	1.31
	0.550189	0.842136	0.592617	0.637289	1.7131	1.64961	1.5482	1.5829
	0.654999	0.97314	0.390702	0.611336	1.91464	1.52835	1.63749	1.62443
	0.532176	0.709585	0.666902	0.530232	1.87143	1.79035	1.51156	1.64808
	0.701798	0.751338	0.654999	0.569577	1.62867	1.5797	1.45884	1.61824
	0.83363	0.654999	0.687211	0.637289	1.66406	1.76347	1.33731	1.12805
	0.736882	0.853034	0.626523	0.654999	1.8411	1.62443	1.88316	1.31
	0.766822	0.776307	0.654999	0.620521	1.72174	1.67678	1.59658	1.59476
	0.930796	0.861852	0.460938	0.616467	1.35092	1.49714	1.74666	1.31
	0.790929	0.815657	0.573115	0.56648	1.6123	1.59476	1.7131	1.53783
	0.74491	0.780948	0.534681	0.604611	1.64684	1.74666	1.63749	1.60113
	0.733605	0.797401	0.550189	0.676141	1.7268	1.75917	1.68429	1.76849
	0.802046	0.708699	0.585305	0.479262	1.63749	1.46593	1.55259	1.31
	0.764153	0.654999	0.689487	0.56144	1.73106	1.48465	1.8411	1.48089
	0.639015	0.691386	0.686191	0.494877	1.63749	1.56192	2.01176	1.78635
	0.740438	0.654999	0.451734	0.436668	1.52835	1.57198	2.00136	1.58786
	0.752553	0.730575	0.550189	0.571018	1.07881	2.41041	2.23964	1.72918
	0.736882	0.68523	0.552665	0.604611	1.44787	1.84594	1.89605	1.78635
	0.577943	0.714532	0.571018	0.654999	1.81382	1.52835	1.62867	1.57198
	0.590772	0.702916	0.6363	0.494877	1.73106	1.49067	1.83398	1.93384
	0.654999	0.80387	0.644259	0.734867	1.77788	1.36696	1.74666	1.45557
	0.614067	0.79878	0.764153	0.74234	1.55259	1.31	1.5482	1.42911
	0.670967	0.687211	0.6238	0.654999	1.49193	1.55954	1.49714	1.36039
	0.790523	0.607082	0.595456	0.667853	1.73483	1.64589	1.64961	1.52835
	0.722771	0.701798	0.585305	0.618619	1.51471	1.76032	1.49067	1.41482
	0.695103	0.719583	0.720506	0.611336	1.76565	1.44098	1.62443	1.35366
	0.705392	0.644259	0.720506	0.614904	1.51685	1.63083	1.78635	1.26483
	0.593581	0.754257	0.682292	0.611336	1.66729	1.64961	1.5429	1.46413
	0.51465	0.714532	0.72779	0.614067	1.31	1.76173	1.56192	1.48863
	0.616467	0.72779	0.575132	0.587254	1.41919	1.45036	1.57198	1.17899
	0.639015	0.792896	0.436668	0.574559	1.31	2.04689	1.69207	1.19771
	0.612729	0.690714	0.609305	0.577943	1.69207	1.84594	1.64961	1.52835
	0.611336	0.673711	0.523989	0.539408	1.31	1.88639	1.93654	1.42561
	0.654999	0.743518	0.500895	0.556737	1.57198		1.87143	1.54115
	0.598852	0.786008	0.535908	0.565694	1.60113		1.5065	1.38708
	0.6238	0.626523	0.530232	0.443716	1.68429		1.67389	1.58577
	0.642159	0.585305	0.607082	0.695924	1.70297		1.65174	1.37896
	0.736882	0.64043	0.573115	0.539408	1.7268		1.51685	1.67389
	0.696803	0.654999	0.50709	0.607082	1.69207		1.80903	1.39735
	0.684764	0.616467	0.500188	0.53743	1.68429		1.47373	1.45557
	0.707399	0.667363	0.462352	0.509457	1.53783		1.81382	1.49714
	0.736882	0.695103	0.609305	0.557952	1.38277		1.70297	1.63749
	0.614904	0.669553	0.672699	0.679272	1.57198		1.36458	1.77483
	0.470261	0.654999	0.577943	0.705392	1.58104		1.3464	1.76565
	0.635141	0.679272	0.598852	0.676141	1.69813		1.31	1.62188
	0.606471	0.702916	0.691386	0.58816	1.5213		1.31	1.87143
	0.632405	0.830742	0.654999	0.709585	1.31		1.40358	1.42227
	0.629813	0.67759	0.491249		1.31		1.62443	1.45557
	0.608221	0.654999	0.532176		1.40702		1.89952	1.58104
	0.576387	0.730845	0.714532		1.11592		1.965	1.21643
	0.539408	0.614067	0.72779		1.11352		1.69207	1.36954
	0.563796	0.549355	0.626523		1.54115		1.63749	1.48465
	0.630742		0.670245		1.79521		1.48863	1.42911
	0.633166		0.744305		1.68429		1.65477	1.36039
	0.72779		0.548361		1.63749		1.61824	1.67389
	0.792084		0.530232		1.66268		1.51471	1.31
	0.633166		0.574559		1.78159		1.81944	1.26633
	0.654999		0.593195		1.8558		1.40702	1.35854
	0.553123		0.545837		1.51156		1.55562	1.36696
	0.6288		0.6363		1.59074		1.64808	1.34851
	0.654999		0.505618		1.62623		1.83398	1.39735
	0.642159		0.705392		1.54393		1.83398	1.49714
	0.590772		0.642159		1.6123		1.84219
	0.633166		0.644259		1.63749		1.80127
	0.643095				1.56352		1.80903
	0.725189				1.56192		1.67137
	0.668371				1.24449		2.02456
	0.654999				1.55562		1.84943
	0.654999				1.56352		1.965
	0.686191				1.56352		1.51156
	0.72779				1.92132		1.54514
	0.793927				1.87959		1.47373
	0.682292				2.07414		1.71657
	0.654999				1.1721
	0.582209				1.58104
	0.6238				1.40358
	0.536896				1.67678
	0.49621				1.80127
	0.538045				1.59074
	0.609305				1.47373
	0.450302				1.55133
	0.795366				1.63749
	0.731174				1.57198
	0.753253				1.47373
	0.616467				1.62188
	0.679272				1.63749
	0.611336				1.80127
	0.595456				1.38485
	0.719583				1.41343
	0.700709				1.22266
	0.786008				1.64589
	0.654999				1.36458
	0.722771				1.51156
	0.554228				1.49714
	0.601896				1.22811
	0.590772				1.33619
	0.523989				1.42392
	0.614067				1.62757
	0.555765				1.22266
	0.436668				1.37237
	0.602588				1.14625
	0.539408				1.26483
	0.641621				1.17449
	0.557439				1.24449
	0.608221
	0.556305
	0.631615
	0.520147
	0.540639
	0.491249
	0.554228
	0.444915
	0.536896
	0.51983
	0.711154
	0.637289
	0.618619
	0.533694

## Sheet: Figure 4F
	Figure 4F	Anterograde and retrograde IFT velocity in crista cilia of control or mutant larvae.
	ctr antero	ttll3 antero		ctr retro	ttll3 retro
	0.519999	0.668566		1.27999	1.26751
	0.456138	0.724273		1.14399	1.31371
	0.713143	0.647116		1.31131	1.47331
	0.570327	0.638587		1.29105	1.38666
	0.508433	0.687135		1.22572	1.18052
	0.598002	0.624006		1.50223	1.23916
	0.519999	0.537336		1.46369	1.29999
	0.49523	0.582404		1.46369	1.25518
	0.586656	0.672935		1.43618	1.17418
	0.629474	0.719996		1.75156	1.13906
	0.475425	0.655658		1.50802	1.14946
	0.53575	0.699642		1.60729	1.14066
	0.676003	0.647544		1.56	1.18857
	0.790405	0.693332		1.33248	1.24798
	0.860699	0.577787		1.49503	1.3084
	0.677218	0.545572		1.5392	1.13456
	0.684869	0.654822		1.88	1.25665
	0.682503	0.61454		1.66403	1.12322
	0.652214	0.674584		1.62933	1.23811
	0.6751	0.640012		1.56	1.32889
	0.594289	0.519999		1.85713	1.37089
	0.693332	0.591379		1.82791	1.35653
	0.668566	0.647544		1.75156	1.15556
	0.635566	0.635566		1.196	1.27999
	0.762671	0.519999		1.10935	1.47037
	0.746078	0.580474		0.891419	1.33248
	0.647116	0.613341		1.2876	1.43765
	0.577787	0.608774		1.13044	1.36688
	0.657969	0.567262		1.32365	1.13675
	0.581165	0.608774		1.45598	1.27999
	0.62883	0.611776		1.68555	1.32365
	0.506658	0.594289		1.73332	1.43998
	0.504234	0.552489		1.6563	1.26288
	0.536784	0.634794		1.5127	1.34589
	0.506658	0.585747		1.66403	1.48571
	0.703524	0.581689		1.35442	1.35653
	0.719996	0.472728		1.38666	1.52002
	0.64999	0.581165		1.2876	1.38666
	0.64999	0.583406		1.17332	1.45598
	0.677218	0.702704		1.40399	1.49503
	0.815142	0.64999		1.06261	1.24798
	0.768689	0.687135		1.65835	1.29999
	0.655658	0.725568		1.50695	1.42698
	0.736661	0.661813		1.44694	1.52533
	0.687135	0.606656		1.83528	1.2876
	0.71373	0.64999		1.56	1.17567
	0.67098	0.701991		1.80468	1.30962
	0.652365	0.758325		1.68003	1.35198
	0.676003	0.505154		1.76797	1.60729
	0.749768	0.693332		1.5392	1.31131
	0.76527	0.704504		1.38666	1.20864
	0.64169	0.560006		1.5127	1.39659
	0.874552	0.519999		1.48571	1.196
	0.739991	0.459541		1.57336	1.39512
	0.643797	0.519999		1.70446	1.29999
	0.737452	0.436791		1.52196	1.33334
	0.775277	0.410527		1.49069	1.24798
	0.719996	0.710238		0.942485	1.24224
	0.803629	0.67758		1.17418	1.43765
	0.673811	0.753997		1.61475	1.3084
	0.620358	0.551837		1.36688	1.34813
	0.585006	0.606656		1.43349	1.18857
	0.746078	0.54026		1.46164	1.36975
	0.575722	0.574324		1.5047	1.57109
	0.551837	0.544762		1.37862	1.26059
	0.634146	0.710238		1.52533	1.51667
	0.602115	0.624006		1.61475	1.43002
	0.583024	0.504234		1.53527	1.50802
	0.561599	0.580474		1.52196	1.59712
	0.567262	0.543999		1.62664	1.37998
	0.738052	0.502062		1.48257	1.365
	0.767623	0.45132		1.81999	1.43618
	0.661813	0.519999		1.41145	1.26751
	0.754523	0.54079		1.41145	1.61031
	0.663447	0.519999		1.43002	1.57575
	0.726351	0.736661		1.56	1.48571
	0.699642	0.627591		1.42134	1.46369
	0.606656	0.61454		1.53112	1.35776
	0.746078	0.550582		1.61376	1.57928
	0.62883	0.5988		1.31904	1.38666
	0.767988	0.602115		1.4098	1.43998
	0.686405	0.594289		1.27113	1.32108
	0.693332	0.832006		1.53112	1.41145
	0.700011	0.685467		1.54512	1.33714
	0.681387	0.745336		1.49659	1.44694
	0.709094	0.651936		1.23675	1.40902
	0.551837	0.687996		1.62339	1.44859
	0.599332	0.674584		1.72423	1.54593
	0.640012	0.624006		1.20638	1.41145
	0.616304	0.666669		1.58475	1.35442
	0.553187	0.548887		1.38666	1.39577
	0.567262	0.637413		1.28962	1.48202
	0.594289	0.598002		1.54076	1.31734
	0.803629	0.585006		1.5779	1.4263
	0.800012	0.575319		1.41817	1.50965
	0.825891	0.560006		1.43449	1.5432
	0.843258	0.611776		1.4812	1.5294
	0.702704	0.574727		1.49069	1.57575
	0.684218	0.589339		1.62933	1.49759
	0.722227	0.590274		1.68997	1.38666
	0.721635	0.646487		1.61376	1.42317
	0.719996	0.577787		1.5432	1.33119
	0.772569	0.486817		1.46548	1.67142
	0.780003	0.585006		1.50622	1.39577
	0.800012	0.854296		1.4	1.62933
	0.762671	0.78532		1.81999	1.32365
	0.638187	0.590274		1.26288	1.38666
	0.76527	0.633051		1.59999	1.41336
	0.64999	0.684869		1.47037	1.47615
	0.657969	0.658655		1.47037	1.5779
	0.672935	0.608311		1.75721	1.61376
	0.509378	0.618366		1.44971	1.43449
	0.591379	0.656851		1.6563	1.59712
	0.619571	0.745666		1.64964	1.60336
	0.567262	0.703524		1.5127	1.64213
	0.788974	0.631435		1.27113	1.48571
	0.738953	0.654822		1.58735	1.33714
	0.774458	0.677218		1.52533	1.63878
	0.819399	0.590274		1.54076	1.4625
	0.716457	0.635566		1.58886	1.49503
	0.856457	0.519999		1.29999	1.68997
	0.715013	0.780003		1.32365	1.56
	0.780003	0.492628		1.59999	1.49659
	0.730816	0.658655		1.70855	1.80264
	0.766306	0.742866		1.44971	1.57575
	0.562162	0.77333		1.4263	1.28962
	0.577787	0.764711		1.54593	1.63878
	0.756353	0.793674		1.36002	1.50965
	0.666669	0.72484		1.50223	1.4263
	0.661813	0.787031		1.48571	1.68647
	0.654822	0.780003		1.59469	1.43349
	0.685467	0.738052		1.78289	1.40543
	0.684869	0.64999		1.46369	1.50223
	0.742866	0.680738		2.00294	1.52533
	0.758909	0.657969		1.82895	1.40902
	0.786346	0.65952		1.52533	1.54076
	0.91318	0.754828		1.60458	1.40399
	0.684218	0.767623		1.41817	1.56
	0.86668	0.718091		1.5432	1.56
	0.727999	0.803629		1.36356	1.43449
	0.832006	0.780003		1.64964	1.44694
	0.836092	0.612851		1.47791	1.44444
	0.883014	0.608311		1.50802	1.34813
	0.753637	0.567262		1.59999	1.41439
	0.742866	0.706412		1.71097	1.60336
	0.698087	0.604663		1.44258	1.59999
	0.704504	0.647116		1.68997	1.57928
	0.751121	0.67098		1.78289	1.5374
	0.800012	0.672935		1.67142	1.16998
	0.846512	0.664443		1.65835	1.64213
	0.753111	0.472728		1.81257	1.70855
	0.775587	0.574727		1.80097	1.48202
	0.805167	0.577787		1.30962	1.56
	0.742866	0.684869		1.54001	1.37428
	0.754274	0.547379		1.39456	1.47999
	0.731847	0.61454		1.73332	1.39659
	0.64999	0.748803		1.85713	1.70855
	0.693332	0.704504		1.77413	1.50622
	0.580474	0.746655		1.84232	1.54076
	0.687135	0.519999		1.76219	1.57485
	0.693332	0.459541		1.76486	1.68997
	0.56458	0.602115		1.90244	1.3084
	0.597037	0.616942		1.91067	1.20002
	0.532103	0.803629		1.91576	1.43998
	0.846512	0.756353		1.78977	1.27485
	0.712583	0.792382		1.83043	1.40174
	0.840014	0.780003		1.6224	1.58078
	0.748059	0.685467		1.73332	1.65175
	0.77635	0.780003		1.77186	1.29999
	0.729542	0.693332		1.57676	1.56
	0.791637	0.832006		1.81037	1.44859
	0.740347	0.707208		1.6343	1.51667
	0.693332	0.766306		1.71097	1.68555
	0.727999	0.729542		1.79114	1.85941
	0.749768	0.712583		1.6343	1.51542
	0.756353	0.722227		1.66403	1.72423
	0.774458	0.826661		1.50223	1.83737
	0.847418	0.672935		1.45598	1.73332
	0.823319	0.657969		1.66403	1.88
	0.788974	0.624006		1.83999	1.74455
	0.826661	0.730219		1.66882	1.74913
	0.757964	0.679184		1.53833	1.76797
	0.797818	0.591379		1.79836	1.76346
	0.815992	0.764711		1.86728	1.62783
	0.96829	0.635566		1.66403	1.60336
	1.07248	0.646487		1.85515	1.68997
	0.855482	0.766306		1.6343	1.68003
	0.896564	0.638187		1.54512	1.59712
	1.01635	0.742866		1.43291	1.51667
	0.935993	0.558508		1.56	1.58602
	0.84407	0.544762		1.75498	1.4812
	0.845004	0.67098		1.74351	1.48571
	0.815142	0.756353		1.79894	1.77186
	0.684556	0.64999		1.83999	1.44444
	0.731847	0.722227		1.88652	1.44258
	0.843258	0.72484		1.80468	1.5421
	0.486817	0.747508		1.89089	1.61779
	0.786346	0.647544		1.70667	1.33714
	0.635566	0.631435		1.79894	1.49219
	0.718547	0.585006		1.71461	1.38666
	0.510549	0.700011		1.75316	1.45598
	0.806009	0.735598		1.56	1.72138
	0.848415	0.727999		1.74455	1.79633
	0.679184	0.732715		2.00568	1.38666
	0.543999	0.753997		1.66403	1.56
	0.879989	0.699642		1.74572	1.50622
	0.63457	0.693332		1.71826	1.64385
	0.600009	0.5988		1.5127	1.5127
	0.661813	0.891419		1.77668	1.59999
	0.645506	0.742866		1.34725	1.45598
	0.624006	0.730816		1.47681	1.5432
	0.653707	0.764711		1.58259	1.58886
	0.602115	0.788974		1.75316	1.32365
	0.544762	0.618366		1.57407	1.88
	0.61454	0.800012		1.42051	1.5925
	0.624006	0.646487		1.60458	1.63878
	0.54363	0.640012		1.49882	1.50526
	0.633051	0.771612		1.73332	1.27113
	0.656851	0.742866		1.75721	1.47331
	0.519999	0.768689		1.41439	1.47331
	0.813912	0.770374		1.57575	1.40399
	0.800012	0.730219		1.57485	1.44444
	0.827283	0.682503		1.71292	1.41336
	0.905812	0.730219		1.73332	1.37278
	0.795284	0.745666		1.92706	1.40707
	0.841905	0.724273		1.74088	1.32365
	0.83651	0.710238		1.61031	1.35776
	0.817136	0.723465		1.58735	1.63998
	0.845004	0.645506		1.84887	1.72002
	0.766306	0.54363		1.85394	1.73332
	0.734129	0.808889		1.62502	1.44971
	0.672935	0.756353		1.56	1.87197
	0.792382	0.737452		1.41439	1.54425
	0.738052	0.684869		1.46548	1.45598
	0.677218	0.731847		1.40399	1.64467
	0.609652	0.684869		1.30962	1.58361
	0.736661	0.815142		1.18343	1.65335
	0.719996	0.780003		1.27113	1.45598
	0.730816	0.790405		1.34332	1.43998
	0.643797	0.753997		1.44694	1.49219
	0.822316	0.608774		1.23999	1.57676
	0.762671	0.668566		1.17418	1.65175
	0.894036	0.693332		1.27113	1.61779
	0.734129	0.808889		1.54076	1.59056
	0.735163	0.742866		1.41439	1.66403
	0.768689	0.633051		1.42317	1.74351
	0.962006	0.785776		1.40707	1.57575
	0.677218	0.764711		1.53261	1.60729
	0.750154	0.655658		1.56	1.54425
	0.610433	0.667181		1.40399	1.62933
	0.598002	0.699299		1.83043	1.49503
	0.748803	0.624006		1.71826	1.66403
	0.746078	0.65952		1.62933	1.66403
	0.837078	0.713143		1.77186	1.53261
	0.798568	0.798135		1.50223	1.63027
	0.670234	0.613341		1.64385	1.6343
	0.780003	0.572005		1.4252	1.56
	0.800012	0.519999		1.72138	1.59712
	0.843769	0.528809		1.80003	1.36975
	0.953318	0.536784		1.43349	1.57575
	0.860699	0.64999		1.4625	1.61475
	0.887805	0.658655		1.64664	1.53112
	0.898179	0.642342		1.69866	1.36975
	0.924459	0.67098		1.89913	1.64664
	0.898972	0.678252		1.6343	1.50223
	0.811193	0.573069		1.51667	1.40399
	0.786346	0.485336		1.47791	1.42134
	0.806532	0.656851		1.16998	1.49759
	0.727999	0.583406		2.00004	1.50223
	0.832006	0.751121		1.5779	1.43998
	0.843258	0.738953		1.43349	1.5432
	0.91318	0.693332		1.61376	1.63802
	0.840854	0.780003		1.89646	1.9067
	0.738953	0.716457		1.52002	1.67741
	0.770374	0.768689		1.34192	1.81257
	0.72484	0.719996		1.74351	1.81999
	0.753997	0.727999		1.65752	1.6343
	0.855117	0.725568		1.12913	1.59712
	0.693332	0.661813		1.49882	1.35198
	0.577787	0.553187		1.43618	1.67741
	0.705722	0.86668		1.70855	1.51667
	0.684218	0.506658		1.62664	1.49882
	0.654822	0.634146		1.75498	1.52002
	0.582404	0.672935		1.65752	1.75156
	0.756353	0.787888		1.47331	1.5127
	0.577787	0.661813		1.9067	1.60336
	0.92115	0.746078		0.704504	1.37278
	0.826661	0.700011		1.73332	1.39863
	0.738953	0.723465		1.7056	1.31531
	0.808889	0.725568		1.9007	1.37278
	0.742866	0.767623		1.69866	1.33714
	0.766306	0.780003		1.79308	1.59999
	0.667181	0.848415		1.59056	1.64664
	0.748059	0.676003		1.6948	1.73332
	0.769588	0.565614		2.01066	1.56
	0.730816	0.71157		1.82791	1.50223
	0.787031	0.71157		1.54593	1.87197
	0.723465	0.685467		1.58735	1.70179
	0.806009	0.759995		1.43002	1.20002
	0.935993	0.656851		1.70179	1.53112
	0.811719	0.474109		1.49219	1.52533
	0.855117	0.577787		1.53527	1.6343
	0.891419	0.632156		1.58259	1.54733
	0.790405	0.768689		1.64664	1.54593
	0.767203	0.748803		1.5275	1.56
	0.832006	0.747508		1.68555	1.5702
	0.83651	0.723465		1.4812	1.64664
	0.775277	0.715013		1.50965	1.51542
	0.845004	0.891419		1.39577	1.4812
	0.780003	0.723465		1.70446	1.35198
	0.752337	0.755077		1.57676	1.38666
	0.770374	0.575319		1.5275	1.365
	0.737452	0.67098		1.44859	1.56
	0.881735	0.586177		1.5294	1.62115
	0.86668	0.638187		1.59056	1.47791
	0.943709	0.693332		1.81999	1.46164
	0.800012	0.677218		1.65335	1.61376
	0.766306	0.611776		1.40174	1.27398
	0.768689	0.619989		1.43002	1.65752
	0.749768	0.707208		1.37912	1.43449
	0.609652	0.693332		1.4812	1.52533
	0.579665	0.686405		1.4625	1.58259
	0.573069	0.519999		1.43002	1.36278
	0.519999	0.71157		1.71292	1.40707
	0.569525	0.854296		1.81999	1.40399
	0.584098	0.678252		1.43998	1.26486
	0.592003	0.780003		1.34105	1.42317
	0.4992	0.659164		1.41817	1.42202
	0.54079	0.723465		1.79114	1.61779
	0.676003	0.643797		1.64964	1.76346
	0.693332	0.751121		1.68233	1.81161
	0.707208	0.61454		1.62115	1.66882
	0.693332	0.742866		1.75498	1.63027
	0.723465	0.693332		1.58886	1.49659
	0.594289	0.884014		1.77562	1.60213
	0.655658	0.780003		1.50223	1.66882
	0.64999	0.634146		1.88	1.65906
	0.648124	0.845004		1.60336	1.7708
	0.656851	0.670234		1.58259	1.81999
	0.722227	0.647116		1.65175	1.94579
	0.544762	0.71157		1.65906	1.67031
	0.632156	0.619571		1.66947	1.38666
	0.627591	0.676003		1.84518	1.67031
	0.579998	0.644802		1.67559	1.61779
	0.796608	0.700882		1.69952	1.72641
	0.706412	0.685467		1.80468	1.67741
	0.636414	0.656851		1.5374	1.49503
	0.803629	0.742866		1.5105	1.77668
	0.678252	0.627591		1.61531	1.50802
	0.555612	0.542613		1.70855	1.56
	0.663191	0.693332		1.21335	1.52002
	0.630293	0.653707		1.15063	1.56
	0.606656	0.71157		1.43618	1.76797
	0.611776	0.633051		1.27835	1.44859
	0.661813	0.629474		1.26607	1.57928
	0.738543	0.654822		1.31592	1.66403
	0.672008	0.78532		1.22911	1.27113
	0.775277	0.674584		1.16772	1.43002
	0.756353	0.8775		1.0589	1.5432
	0.613047	0.917658		1.18857	1.6343
	0.727999	0.850897		1.06365	1.7056
	0.693332	0.771612		1.50223	1.29999
	0.505154	0.77491		1.53527	1.8633
	0.55804	0.780003		1.52533	1.6563
	0.703524	0.80166		1.54844	1.58259
	0.663447	0.771021		1.64213	1.54593
	0.558508	0.775277		1.43291	1.65175
	0.503226	0.644802		1.46955	1.46825
	0.653023	0.693332		1.27999	1.57485
	0.72484	0.903166		1.47331	1.534
	0.62883	0.758909		1.60213	1.72253
	0.594289	0.891419		1.59804	1.53261
	0.681958	0.887805		1.64385	1.4812
	0.727999	0.77491		1.65456	1.60729
	0.752337	0.800012		1.43618	1.3492
	0.704001	0.884014		1.62783	1.47037
	0.603206	0.723465		1.64964	1.5779
	0.588667	0.800012		1.39929	1.61031
	0.590274	0.719996		1.61197	1.235
	0.64999	0.745666		1.71603	1.59712
	0.594289	0.669823		1.74572	1.74572
	0.685467	0.664929		1.5127	1.57676
	0.661813	0.842747		1.57676	1.56
	0.630293	0.813093		1.46094	1.51667
	0.746078	0.710238		1.70855	1.4812
	0.66031	0.710238		1.72342	1.6224
	0.653023	0.843258		1.84518	1.37428
	0.634146	0.86668		1.57485	1.29999
	0.709094	0.766306		1.5105	1.58475
	0.800012	0.756353		1.9067	1.5127
	0.714024	0.871365		1.73332	1.44859
	0.76527	0.706412		1.45598	1.63998
	0.780003	0.848415		1.39863	1.56
	0.78532	0.902657		1.54076	1.59999
	0.736007	0.752005		1.51542	1.61779
	0.793215	0.667463		1.41817	1.54076
	0.839294	0.702704		1.35442	1.58078
	0.827757	0.693332		1.51786	1.6948
	0.931665	0.715013		1.48571	1.52533
	0.561599	0.764711		1.68997	1.61779
	0.61454	0.764711		1.50622	1.63998
	0.718091	0.753111		1.56	1.49759
	0.64999	0.616304		1.50223	1.89646
	0.674584	0.71157		1.6782	1.87197
	0.655658	0.684218		1.20928	1.83999
	0.681387	0.871365		1.56	1.63027
	0.738953	0.710664		1.58168	1.8133
	0.661813	0.742866		1.59317	1.79633
	0.674584	0.594289		1.80759	1.82791
	0.735598	0.616304		1.61779	1.64213
	0.716056	0.613341		1.38666	2.00004
	0.717234	0.661813		1.40174	1.88194
	0.811719	0.770374		1.37428	1.9224
	0.66383	0.693332		1.56	1.91361
	0.759995	0.812508		1.29105	1.62502
	0.666669	0.693332		1.58259	1.5421
	0.594289	0.677218		1.66403	1.72342
	0.64999	0.742866		1.67304	1.60458
	0.699009	0.715013		1.38666	1.88497
	0.698746	0.685467		1.74718	2.00294
	0.693332	0.747508		1.80003	1.87197
	0.657969	0.756353		1.72002	1.69866
	0.797328	0.746655		1.85394	1.9007
	0.676003	0.848415		1.56	1.73332
	0.56458	0.803629		1.52533	1.77562
	0.713143	0.746655		1.5779	1.60213
	0.693332	0.735598		1.45598	1.91752
	0.598365	0.768689		1.43002	1.4812
	0.688648	0.710238		1.52287	1.56
	0.682503	0.822316		1.70855	1.58475
	0.674584	0.813912		2.00004	1.68003
	0.745336	0.924459		1.98545	1.73332
	0.571272	0.787888		1.66403	1.78289
	0.633748	0.708084		1.76002	1.72138
	0.701991	0.766306		1.56	1.6343
	0.731847	0.739554		1.64964	1.59056
	0.794191	0.730816		1.83237	1.45598
	0.642919	0.767623		1.35776	1.70446
	0.757714	0.746078		1.4812	1.87197
	0.620653	0.693332		1.9067	1.6343
	0.653023	0.664443		1.64664	1.78747
	0.64999	0.732715		1.58259	1.66403
	0.688831	0.713143		1.5779	1.60213
	0.617507	0.832006		1.71097	1.73332
	0.643797	0.771612		1.57575	1.47331
	0.553187	0.716457		1.67741	1.58735
	0.746078	0.656851		1.56	1.5779
	0.468006	0.631435		1.65752	1.70855
	0.780003	0.677218		1.73332	1.8525
	0.609652	0.71373		1.68555	1.51786
	0.613781	0.739554		1.61779	1.58735
	0.479997	0.653707		1.35198	1.63027
	0.594289	0.597037		1.27113	1.82791
	0.572005	0.674584		1.41817	1.78747
	0.594289	0.683438		1.35653	1.71292
	0.638187	0.715013		1.37089	1.68384
	0.351353	0.64999		1.46548	1.71826
	0.470933	0.624006		1.64213	1.74913
	0.558812	0.55804		1.64964	1.80869
	0.61552	0.985269		1.41439	1.34332
	0.600009	0.858011		1.49069	1.56
	0.618366	0.848415		1.25518	1.41439
	0.734129	0.725568		1.34589	1.89426
	0.678252	0.832006		1.64964	1.78289
	0.732715	0.699642		1.42134	1.4625
	0.737452	0.748059		1.57928	1.62783
	0.906675	0.562162		1.64664	1.74455
	0.800012	0.800012		1.64213	1.61779
	0.77491	0.713143		1.58078	1.80264
	0.740347	0.83651		1.30962	1.56
	0.67758	0.780003		1.59712	1.63998
	0.709094	0.791293		1.59469	1.73332
	0.737452	0.730219		1.52287	1.5294
	0.718547	0.806009		1.64964	1.5392
	0.730219	0.71157		1.47615	1.67031
	0.808889	0.730816		1.76346	1.80264
	0.748803	0.780003		1.48571	1.71292
	0.754828	0.600009		1.36841	1.54733
	0.747508	0.567262		1.6563	1.66403
	0.723465	0.758325		1.80003	1.66403
	0.652543	0.715013		1.59804	1.59999
	0.747508			1.83737	1.89913
	0.687448			1.65752	1.68555
	0.701383			1.69374	1.77186
	0.759995			1.66882	1.64964
	0.825891			1.63878	1.78747
	0.856457			1.56	1.78289
	0.64999			1.59999	1.78877
	0.701383			1.50223	2.08
				1.46825	1.87197
				1.68384	1.74572
				1.49954	1.75498
				1.33714	1.76002
				1.58735	1.73332
				1.6563	1.44444
				1.77896	1.74455
				1.6095	1.68997
				1.70446	1.48909
				1.53527	1.48571
				1.60336	1.5275
				1.64213	1.6563
				1.57336	1.40543
				1.59804	1.54512
				1.52373	1.77896
				1.54593	1.61031
				1.52533	1.78877
				1.63998	1.93141
				1.61779	1.58735
				1.44258	1.56
				1.5421	1.61779
				1.56	1.51542
				1.39659	1.91361
				1.57336	1.89426
				1.79402	1.45598
				1.83043	1.81037
				1.60336	1.68384
				1.73332	1.75156
				1.89913	1.41558
				1.47331	1.72138
				1.56	1.64964
				1.34192	1.49503
				1.3084	1.50223
				1.45598	1.54512
				1.49503	1.43618
				1.61031	1.5294
				1.29211	1.79308
				1.19756	1.9067
				1.58078	1.92593
				1.66403	1.88194
				1.70179	1.53261
				1.83999	1.59999
				1.43765	1.77413
				1.27398	1.52002
				1.72342	1.80468
				1.65835	1.79633
				1.64664	1.72138
				1.61475	1.65175
				1.60213	1.87197
				1.53527	1.70855
				1.72423	1.77804
				1.56	1.87197
				1.72002	1.77668
				1.44258	1.5421
				1.88497	1.99332
				1.67142	1.67031
				1.73332	1.59712
				1.68233	1.57336
				1.14946	1.60729
				1.41817	1.72253
					1.68647
					1.96
					2.12
					1.82895

## Sheet: Figure 4G
	Figure 4G	Anterograde and retrograde IFT velocity in crista cilia of control or morphant larvae.
	ctr MO antero	ccp5 MO antero	ttll6 MO antero	ctr MO retro	ccp5 MO retro	ttll6 MO retro
	0.722234	0.722234	0.478951	1.43576	1.1074	1.42189
	0.667564	0.742861	0.475012	1.61514	1.21873	1.48571
	0.700007	0.539621	0.500013	1.71052	1.36499	1.18856
	0.562156	0.545162	0.440329	1.63702	1.59356	1.25939
	0.577764	0.536512	0.484318	1.48571	1.78288	1.26062
	0.376307	0.51211	0.424479	1.77272	1.3951	1.18183
	0.570741	0.574995	0.487499	1.48571	1.41305	1.17419
	0.668568	0.52962	0.491099	1.44446	1.52415	1.15557
	0.633322	0.516439	0.467183	1.11427	1.46248	1.16999
	0.562156	0.453497	0.360009	1.22352	1.3	1.04721
	0.602447	0.56874	0.419989	1.79998	1.56591	1.18694
	0.561375	0.59091	0.400007	1.20715	1.49364	0.887798
	0.425458	0.50408	0.523889	1.46248	1.04635	0.876102
	0.60667	0.533328	0.440683	1.37649	1.18528	1.33332
	0.51211	0.61021	0.426865	1.60588	1.4	1.14244
	0.666676	0.54167	0.494005	1.25355	1.23953	1.3
	0.688227	0.503741	0.423901	1.35909	1.3975	1.17419
	0.702702	0.487499	0.44	1.35653	1.35416	1.44446
	0.62174	0.649999	0.553183	1.49022	1.36843	1.42998
	0.460405	0.367936	0.472725	1.3553	1.54763	1.41305
	0.452174	0.354543	0.379162	1.38669	1.3975	1.43682
	0.528801	0.519989	0.524574	1.05238	1.3	1.46248
	0.548901	0.536512	0.494005	1.42583	1.33514	0.895571
	0.519989	0.260002	0.54167	1.5786	1.42189	0.947455
	0.462219	0.519989	0.449098	1.56764	1.04564	0.866664
	0.500013	0.5151	0.357982	1.5786	0.975004	1.01111
	0.460405	0.846522	0.374587	1.47332	1.03236	1.20369
	0.422496	0.679999	0.402815	1.57082	1.19998	1.24092
	0.424479	0.717254	0.381033	1.82962	0.922565	1.04001
	0.416984	0.649999	0.397971	1.46959	0.914808	1.10639
	0.563342	0.557154	0.507319	1.83185	1.5786	1.0347
	0.433335	0.513945	0.442556	1.35416	1.54654	1.3
	0.500013	0.478951	0.478951	1.51668	1.42998	1.1375
	0.472725	0.619038	0.401821	1.495	1.4182	1.3
	0.519989	0.536512	0.433335	1.73333	1.71492	1.33612
	0.5151	0.487499	0.451385	1.72159	1.64414	1.27345
	0.54167	0.560783	0.388066	1.78752	1.79998	1.34817
	0.577764	0.563342	0.468003	1.80555	1.90245	1.2711
	0.501759	0.804747	0.344106	1.70347	1.80409	1.18856
	0.560353	0.780008	0.487499	1.51668	1.70236	1.15144
	0.525524	0.571987	0.563342	1.25667	2.0042	1.05814
	0.472725	0.62174	0.371419	1.36666	1.59714	1.00002
	0.52962	0.535291	0.409265	1.3	1.65135	1.18528
	0.453497	0.674086	0.451029	1.43682	1.47726	1.36843
	0.594912	0.54167	0.47756	1.13227	1.82705	1.40402
	0.524205	0.61021	0.551523	1.18528	1.6972	1.19165
	0.490166	0.523889	0.560783	1.06787	1.53638	1.25001
	0.425458	0.622911	0.574995	1.12665	1.50968	1.23953
	0.561375	0.503219	0.557154	1.20369	1.62499	1.25093
	0.533328	0.557154	0.622911	1.42583	1.80868	1.24583
	0.526184	0.574426	0.585908	1.53215	1.6095	1.15229
	0.742861	0.585007	0.596724	1.77272	1.84164	1.32451
	0.752644	0.56874	0.475012	1.56898	1.82813	1.3553
	0.69536	0.559734	0.39393	1.62499	1.87199	1.26751
	0.693319	0.523387	0.414483	1.73333	1.36843	1.3
	0.729257	0.593486	0.379162	1.63913	1.01564	1.38126
	0.673223	0.561375	0.531818	1.89088	1.55998	1.27172
	0.737843	0.582771	0.524997	1.4345	1.95	1.3
	0.649999	0.577764	0.539036	1.19998	1.43929	2.08003
	0.593486	0.633322	0.500013	1.50002	1.6033	1.36189
	0.596724	0.577764	0.487499	1.495	1.61203	1.3
	0.630293	0.662755	0.524205	1.44446	1.46248	1.63913
	0.693319	0.565229	0.478951	1.36499	1.68998	1.3
	0.649999	0.60667	0.505568	1.71934	1.5108	1.17811
	0.729257	0.742861	0.545989	1.49258	1.65135	1.21036
	0.573531	0.775448	0.481478	1.78752	1.55159	1.15281
	0.539621	0.705079	0.583671	1.60789	1.7815	1.4182
	0.611761	0.625927	0.536963	1.57367	1.65456	1.14244
	0.587109	0.661812	0.460405	1.65456	1.90938	1.15557
	0.668568	0.433335	0.433335	1.38126	1.73333	0.99666
	0.547378	0.585908	0.632424	1.90003	1.68998	1.07587
	0.573531	0.649999	0.585007	1.81074	1.81998	1.33822
	0.75832	0.649999	0.422496	1.49258	1.77668	1.1607
	0.735834	0.548446	0.482252	1.70625	1.79311	1.3
	0.675988	0.5151	0.433335	1.81074	1.68998	1.11129
	0.668568	0.598401	0.45742	1.86878	1.76799	1.11427
	0.505568	0.588667	0.425458	1.75218	1.45295	1.19998
	0.602447	0.552487	0.501759	1.83796	1.4978	1.15144
	0.587109	0.608052	0.54167	1.62499	1.54593	1.01111
	0.572881	0.625312	0.50408	1.78752	1.33169	1.20251
	0.526184	0.538584	0.580348	1.73333	1.65861	1.08335
	0.571987	0.505568	0.478951	1.75499	1.44446	1.19165
	0.835707	0.619038	0.385176	1.86878	1.52609	1.25518
	0.574995	0.575402	0.305894	1.77564	1.67915	1.33332
	0.60667	0.588093	0.416008	1.42998	1.46248	1.36047
	0.802928	0.649999	0.400007	1.71598	1.3	1.4345
	0.746809	0.787866	0.410537	1.70002	1.59543	1.62499
	0.791314	0.574426	0.354543	1.24801	1.16315	1.6095
	0.701999	0.672417	0.371419	1.51668	1.41305	1.23159
	0.686805	0.713736	0.709077	1.19165	1.6033	1.48912
	0.649999	0.700007	0.577764	1.3	1.59714	1.35
	0.649999	0.598401	0.577764	1.63702	1.6972	1.52609
	0.638975	0.729257	0.680953	1.63913	1.3	1.26287
	0.637257	0.583671	0.629677	1.62499	1.26667	1.3
	0.533328	0.454999	0.602447	1.63549	1.26578	1.40835
	0.562156	0.504472	0.528113	1.46248	1.23335	1.34332
	0.515862	0.485068	0.60938	1.48571	1.42189	1.45755
	0.557154	0.41786	0.60667	1.2381	1.10502	1.3
	0.52703	0.579994	0.470209	1.02142	1.60233	1.43682
	0.519989	0.51211	0.426564	1.68998	1.3	1.4345
	0.519989	0.608522	0.553693	1.7086	1.38387	1.06601
	0.615785	0.547378	0.50408	1.77668	1.45602	1.22909
	0.602447	0.673223	0.513159	1.58259	1.62499	1.06362
	0.507319	0.622911	0.665129	1.75884	1.56669	0.982933
	0.548446	0.575402	0.58209	1.51668	1.55998	0.994105
	0.588667	0.570173	0.668568	1.48571	1.55998	1.45295
	0.472725	0.722234	0.649999	1.62499	1.42583	1.25355
	0.557154	0.649999	0.583671	1.3788	1.18694	1.25807
	0.581573	0.608052	0.619038	1.41305	1.53638	1.26287
	0.580838	0.480446	0.545162	1.35	1.48571	1.4345
	0.51211	0.680953	0.456145	1.37649	1.21333	1.26906
	0.525524	0.444735	0.507319	1.40402	1.58891	1.21036
	0.519989	0.543642	0.509805	1.73333	1.43682	1.2152
	0.524574	0.50677	0.458823	1.54074	1.37025	1.25355
	0.490555	0.468003	0.487499	1.64213	1.54999	1.52415
	0.487499	0.602447	0.389994	1.87779	1.55998	1.34192
	0.513945	0.562156	0.468849	1.22352	1.26486	1.48571
	0.608522	0.649999	0.513159	1.3	1.25939	1.44857
	0.544175	0.60938	0.439444	1.22776	1.22776	1.47726
	0.577764	0.649999	0.413633	1.65456	1.12071	1.14707
	0.481478	0.483724	0.330158	1.67915	1.3	1.4182
	0.543295	0.665845	0.472725	1.67143	1.67631	1.36843
	0.442556	0.428399	0.47756	1.52609	1.62499	1.3
	0.491903	0.543295	0.386485	1.62499	1.6656	1.03236
	0.52703	0.484757	0.349988	1.55998	1.7815	1.48571
	0.543642	0.825005	0.557154	2.03127	1.3	1.52076
	0.557154	0.780008	0.426564	1.46959	1.4	1.1607
	0.494005	0.729257	0.398393	1.52194	1.34906	1.36843
	0.56874	0.731257	0.426237	1.52286	1.60588	1.42383
	0.525524	0.698515	0.526184	1.52939	1.59356	1.62499
	0.433335	0.613203	0.448286	1.67915	1.73333	1.35
	0.747503	0.649999	0.446865	1.67143	1.18183	1.54374
	0.592992	0.791314	0.495226	1.24583	1.6033	1.55998
	0.649999	0.728005	0.61021	1.46959	1.49696	1.44446
	0.549997	0.774464	0.397227	1.3	1.6865	1.3
	0.613203	0.768175	0.688227	1.21036	1.34061	1.08335
	0.46429	0.636723	0.571987	1.25185	1.57367	1.34817
	0.594281	0.617508	0.635542	1.25518	1.77668	1.34483
	0.503219	0.806317	0.519989	1.39286	1.46773	1.39286
	0.469439	0.679104	0.519989	1.59186	1.5786	1.54374
	0.453039	0.856834	0.519989	1.26287	1.74472	1.63913
	0.491903	0.68939	0.466031	1.56669	1.33822	1.44056
	0.544175	0.754008	0.50228	1.89088	1.42189	1.42383
	0.548901	0.594912	0.543642	1.63333	1.63427	1.54374
	0.649999	0.678266	0.501759	1.49258	1.57574	1.44056
	0.454999	0.704169	0.441518	1.62499	1.24801	1.58891
	0.722234	0.519989	0.539036	1.49258	1.1607	1.58535
	0.60938	0.661812	0.487499	1.3	1.34483	1.50314
	0.712909	0.678266	0.531818	1.65748	1.64668	1.49258
	0.637736	0.604654	0.582771	1.59999	1.47929	1.57082
	0.626794	0.689797	0.577764	1.52286	1.58439	1.60588
	0.689797	0.625005	0.494005	1.3	1.55998	1.71052
	0.664442	0.611761	0.565229	1.24583	1.63333	1.26287
	0.619038	0.524997	0.632424	1.45602	1.81214	1.71219
	0.519989	0.667564	0.711906	1.52415	1.69395	1.5528
	0.577764	0.804747	0.722234	1.44999	1.67143	1.47565
	0.649999	0.586262	0.675988	1.47726	1.61381	1.50002
	0.620458	0.662755	0.660327	1.51668	1.71785	1.46248
	0.592992	0.67098	0.629677	1.50798	1.47332	1.50002
	0.637736	0.772958	0.689797	1.35909	1.67915	1.5786
	0.583671	0.755829	0.684224	1.45602	1.37649	1.5275
	0.596724	0.747503	0.67167	1.62499	1.52286	1.42583
	0.624	0.663269	0.649999	1.55998	1.50002	1.57574
	0.553183	0.632424	0.557154	1.49258	1.45295	1.6033
	0.539621	0.701999	0.701999	1.3	1.61624	1.38863
	0.509805	0.694835	0.582771	1.32956	1.54374	1.55159
	0.668568	0.638186	0.511481	1.33939	1.56898	1.59543
	0.560783	0.690611	0.505568	1.58439	1.71219	1.73333
	0.592992	0.784489	0.634895	1.46248	1.73333	1.60588
	0.581573	0.694835	0.62174	1.34642	1.42998	1.6095
	0.63616	0.722234	0.531818	1.55998	1.47332	1.6033
	0.574426	0.577764	0.666676	1.42039	1.51668	1.44446
	0.60667	0.719149	0.60667	1.3	1.38965	1.47104
	0.475604	0.700007	0.592992	1.4054	1.87779	1.4182
	0.548901	0.661812	0.608522	1.50968	1.40402	1.57082
	0.494005	0.608522	0.682486	1.42094	1.6033	1.50968
	0.709077	0.693319	0.561375	1.40835	1.78752	1.66668
	0.674086	0.739223	0.601483	1.44446	1.63913	1.54374
	0.625005	0.75832	0.601841	1.34192	1.57367	1.44446
	0.567281	0.62174	0.56874	1.33715	1.50224	1.45755
	0.629032	0.668568	0.635542	1.62499	1.5275	1.4054
	0.489622	0.682486	0.601841	1.57082	1.89088	1.40835
	0.492422	0.663269	0.51552	1.6095	1.80868	1.42583
	0.50408	0.574426	0.536963	1.47726	1.4	1.61381
	0.553183	0.633322	0.500013	1.37221	1.55998	1.5786
	0.535291	0.704169	0.715006	1.33169	1.80555	1.51668
	0.500013	0.630293	0.599996	1.44999	1.72159	1.51668
	0.403437	0.588093	0.617508	1.25355	1.51668	1.65135
	0.392444	0.666676	0.597301	1.25001	1.87199	1.4345
	0.490555	0.633322	0.613203	1.70002	1.73333	1.58891
	0.423901	0.795923	0.588667	1.63333	1.6095	1.55998
	0.406249	0.772467	0.560783	1.47929	1.77272	1.68998
	0.505568	0.658016	0.60667	1.24092	1.83796	1.87779
	0.508706	0.667564	0.649999	1.38387	1.52939	1.43929
	0.508706	0.625005	0.679537	1.33612	1.95	1.46773
	0.371419	0.752644	0.649999	1.3	1.68516	1.59543
	0.483724	0.686108	0.726456	1.46773	2.11246	1.46665
	0.418636	0.649999	0.577764	1.55998	2.12332	1.46959
	0.433335	0.633322	0.595845	1.3788	1.73333	1.4182
	0.513945	0.52962	0.413633	1.41473	2.02799	1.61203
	0.511481	0.585007	0.56415	1.00002	2.01721	1.37649
	0.487499	0.570741	0.638186	1.49258	1.89088	1.71598
	0.433335	0.76472	0.603578	1.34061	2.14503	1.68723
	0.371419	0.771178	0.593486	1.3	2.04287	1.59356
	0.548901	0.7694	0.500013	1.20487	1.59543	1.82962
	0.535291	0.637736	0.460405	1.3	1.64414	1.55159
	0.585007	0.713736	0.462705	1.14244	1.76128	1.3
	0.56874	0.7511	0.482846	1.23335	1.62499	1.3
	0.545989	0.790195	0.371419	1.50527	1.41305	1.42039
	0.389994	0.697551	0.557154	1.44446	1.65861	1.42683
	0.577764	0.877488	0.635542	1.19998	1.68516	1.44446
	0.478951	0.856086	0.524997	1.41062	1.6656	1.58439
	0.482252	0.738623	0.664442	1.46248	1.75001	1.64213
	0.539036	0.784489	0.54167	1.495	1.74688	1.3951
	0.395664	0.797734	0.446865	1.44999	1.84999	1.55998
	0.491099	0.722234	0.62174	1.42998	1.87199	1.58891
	0.484318	0.680953	0.472725	1.22352	2.10004	1.6656
	0.40493	0.771178	0.674086	1.35	1.97823	1.50527
	0.376799	0.812488	0.626794	1.45295	1.48571	1.4182
	0.375005	0.630293	0.474601	1.68998	1.69566	1.51668
	0.403437	0.738623	0.469439	1.76431	1.42583	1.38126
	0.397971	0.866664	0.577764	1.67915	1.7667	1.4182
	0.481478	0.734786	0.677083	1.64414	1.68237	1.61381
	0.40747	0.548901	0.475604	1.63913	1.495	1.4477
	0.40493	0.608522	0.565229	2.00911	1.68237	1.55998
	0.433335	0.624	0.636723	1.64999	1.79522	1.44999
	0.354543	0.649999	0.597301	1.90666	1.44446	1.40835
	0.373972	0.666676	0.686108	1.69395	1.52415	1.45295
	0.668568	0.565229	0.51552	1.49258	1.65861	1.45295
	0.577764	0.539993	0.458823	1.61203	1.36189	1.54593
	0.62174	0.633322	0.472725	1.73333	1.24092	1.36189
	0.61021	0.679537	0.441518	1.80868	1.74688	1.55998
	0.637736	0.724998	0.470696	1.49258	1.51668	1.04001
	0.601841	0.54167	0.718408	1.71934	1.50968	1.35653
	0.59091	0.531818	0.649999	1.58891		1.22352
	0.649999	0.734786	0.567281	1.62499		1.51668
	0.790195	0.700007	0.611761	1.52286		1.38965
	0.67167	0.691484	0.557154	1.5786		1.3
	0.613897	0.629032	0.519989	1.50798		1.23499
	0.60667	0.688227	0.51211	1.34332		1.4054
	0.661412	0.56666	0.5151	1.81998		1.25518
	0.663841	0.634137	0.508706	1.67915		1.43682
	0.675988	0.622911	0.433335	1.46959		1.23034
	0.597988	0.594912	0.536963	1.84738		1.44999
	0.640299	0.624	0.620458	2.30459		1.44056
	0.631442	0.608052	0.635542	1.83796		1.41305
	0.696441	0.5306	0.59091	1.3		1.48138
	0.69195	0.507319	0.597301	1.63427		1.36342
	0.610598	0.693319	0.451029	1.71052		1.33939
	0.574426	0.580838	0.422496	1.71492		1.35
	0.649999	0.60667	0.393013	1.68516		1.3788
	0.722234	0.545162	0.460405	1.6774		1.45755
	0.561375	0.719149	0.441518	1.4345		1.3
	0.510721	0.614535	0.514575	1.11427		1.35
	0.557154	0.662269	0.413633	1.62499		1.20715
	0.535291	0.611761	0.458823	1.3		1.4
	0.599996		0.425458			1.37025
	0.597988		0.472725			1.65135
	0.487499		0.337026			1.41305
	0.615785		0.441063			1.4
	0.630293		0.519989			1.3975
	0.493097		0.602447			1.45852
	0.561375		0.443898			1.37649
	0.632424		0.453497			1.52809
	0.514575		0.468003			1.18528
	0.557154		0.410537			1.3
	0.575402		0.50228			1.45755
	0.672417		0.425458			1.34061
	0.678266		0.466031			0.965712
	0.586262		0.59091			1.33715
	0.678266		0.480446			1.19165
	0.579994		0.531818			1.11427
	0.492422		0.629677			1.3
	0.40493		0.588093			1.40264
	0.426564		0.608052			1.42189
	0.519989		0.603578			1.70002
	0.601841		0.531818			1.54074
	0.547378		0.505568			1.57367
	0.58905		0.585007			1.495
	0.588667		0.524997			1.68516
	0.548901		0.50142			1.65456
	0.536963		0.421618			1.63193
	0.635542		0.446865			1.50968
	0.686805		0.503219			1.39628
	0.565229		0.454999			1.35909
	0.583671		0.638186			1.45295
	0.585007		0.385176			1.40835
			0.458823			1.3
			0.519989			1.35
			0.423249			1.4
			0.371419			1.42683
			0.46429			1.36047
			0.613203			1.2093
			0.438206			1.33939
			0.454999			1.3788
			0.519989			1.33612
			0.5306			1.3
			0.560783			1.33715
			0.460405			1.34192
			0.62467			1.4345
			0.519989			1.33715
			0.562695			1.3788
			0.500013			1.58259
			0.560353			1.3
			0.528801			1.6774
