# Supplementary material for: Ciliary length regulation by intraflagellar transport in zebrafish
Source: eLife. 2024 Dec 13;13:RP93168. doi: 10.7554/eLife.93168 (PMC11643619; doi:10.7554/eLife.93168)
Supplement: Figure 5—source data 1. [file elife-93168-fig5-data1.xlsx]

## Sheet: Figure 5B
	Figure 5B	Number of IFT particles per cilia in crista recorded by spinning disk and STED.
	Spinning Disk	STED
	23	41
	17	35
	30	45
	21	29
	19	52
	17	38
	14	36
	20	44
	19	43
	20	68
	21	77
	16	47
	20	32
	24	45
	26

## Sheet: Figure 5C
	Figure 5C	IFT particles size in the cilia of ear crista and spinal cord.
	crista	spinal cord
	0.10988	0.1152
	0.10586	0.075
	0.1273	0.0738
	0.11792	0.0756
	0.11859	0.0582
	0.0871	0.0954
	0.13132	0.1014
	0.12261	0.1062
	0.11323	0.0942
	0.11055	0.099
	0.09447	0.1212
	0.10988	0.087
	0.10251	0.1098
	0.10854	0.0864
	0.10251	0.0823
	0.12328	0.126
	0.10653	0.0782
	0.15209	0.0848
	0.15812	0.1103
	0.11993	0.0774
	0.13601	0.0778
	0.14405	0.0791
	0.14606	0.0906
	0.09313	0.093
	0.09715	0.1198
	0.11524	0.1263
	0.12261	0.097
	0.14204	0.11
	0.11658	0.0864
	0.09715	0.0947
	0.08911	0.1281
	0.134	0.1044
	0.14003	0.1165
	0.11859	0.0902
	0.13065	0.126
	0.13534
	0.16683
	0.15745
	0.12462
	0.13802
	0.16147
	0.12127
	0.15008
	0.12998

## Sheet: Figure 5E
	Figure 5E	Cilia length of control and ift88 morphants.
	ctr	ift88 MO
	21.7206	5.46218
	22.5799	8.69733
	21.7442	16.7895
	24.1282	22.1523
	20.19	17.542
	20.3348	13.1489
	8.00927	6.49465
	15.449	12.9915
	21.9284	15.8665
	24.6012	6.75491
	27.6243	11.872
	24.9419	7.57828
	21.3963	18.3595
	22.0057	14.8112
	17.4729	20.7356
	25.0583	25.3941
	25.295	16.2882
	22.9717	6.05086
	19.8101	12.7635
	20.6185	10.8073
	13.3157	16.5334
	24.6701	9.76595
	25.3092	17.0877
	21.4598	21.6495
	21.1875	9.45107
	19.4729	16.6791
	10.8073	23.0901
	22.4561	14.4702
	20.0047	19.4945
	21.6283	15.5467
	19.7691	16.9811
	20.2677	6.6238
	26.9345	17.7393
	22.2015	17.1319
	15.1684	15.9351
	14.0995	15.1044
	22.676	16.7733
	24.2244	11.1571
	27.136	13.284
	6.30055	15.8761
	18.7865	11.6117
	24.9055	15.9654
	22.8037	11.5305
	21.481	12.7088
	17.8498	24.9336
	26.4607	21.4303
	28.6039	6.49932
	24.5075	18.4419
	17.0451	16.9757
	23.8822	14.8112
	27.7491	16.9757
	24.3752	16.2899
	27.136	19.4837
	23.7488	22.1523
	28.4701	18.4124
	28.0711	4.09418
	17.6384	10.4513
	25.5887	12.792
	23.188	16.7733
	25.3427	8.39647
	20.91	22.4453
	23.7196	22.4886
		15.341
		15.2144
		15.5292
		25.0871
		3.74707
		19.0328
		14.5701
		14.9169
		20.4313
		11.6557
		23.7437
		5.41766
		21.7066
		16.0429
		21.0957
		10.4744
		18.9612
		11.6946
		17.7154
		22.4305
		21.0182
		17.2271
		16.9651
		12.9145
		15.638
		11.6663

## Sheet: Figure 5G
	Figure 5G	Number of IFT particles per cilia in control and ift88 morphants.
	Ctr	MO
	34	17
	45	12
	24	29
	39	31
	51	12
	54	28
	55	18
	60	15
	30	22
		21
		14

## Sheet: Figure 5H
	Figure 5H	IFT particles size of crista cilia in control or ift88 morphants.
	Ctr	MO
	0.11907	0.11529
	0.11277	0.09198
	0.11844	0.10017
	0.08253	0.07812
	0.08442	0.08001
	0.10962	0.0819
	0.10143	0.09072
	0.11025	0.11277
	0.09639	0.07812
	0.09765	0.0882
	0.10521	0.07749
	0.12033	0.08505
	0.11403	0.07749
	0.09828	0.08379
	0.08883	0.08064
	0.07875	0.07812
	0.09261	0.09072
	0.12474	0.08883
	0.07245	0.07938
	0.07182	0.10017
	0.08568	0.08631
	0.09891	0.07749
	0.08631	0.07245
	0.08379	0.06615
	0.11907	0.06489
	0.10899	0.0693
	0.12411	0.09198
	0.09198	0.06237
	0.09954	0.07434
	0.14868	0.07371
	0.14679	0.07434
	0.08316	0.08001
	0.1197	0.06804
	0.10332	0.06804
	0.11781	0.06804
	0.12033	0.0756
	0.09702	0.08127
	0.08127	0.07371
	0.09513	0.06552
	0.10584	0.06678
	0.07308	0.05796
	0.10269	0.08883
	0.08316	0.05985
	0.09765	0.09513
	0.08127	0.07119
	0.06489	0.07119
	0.06867	0.05796
	0.0693	0.06804
	0.06867	0.07875
	0.07623	0.05922
	0.08694	0.06426
	0.06615	0.10395
	0.07875	0.08064
	0.09324	0.07245
	0.10143	0.08631
	0.08379	0.09387
	0.08631	0.11403
	0.11844	0.07308
	0.10962	0.08694
	0.08316	0.07686
	0.09639	0.07434
	0.11781	0.08064
	0.12663	0.126
	0.10773	0.09009
	0.09639	0.06615
	0.13797	0.12096
	0.09324	0.08757
	0.10773	0.09324
	0.13671	0.09387
	0.11088	0.12474
	0.08253	0.09135
	0.1008	0.12096
	0.10773	0.09576
	0.09639	0.06804
	0.12159	0.05985
	0.09261	0.08316
	0.11844	0.08001
	0.13419	0.07686
	0.12978	0.07245
	0.09828	0.06489
	0.09513	0.05922
	0.0945	0.05985
	0.13545	0.07182
	0.13734	0.06615
	0.15183	0.06867
	0.11907	0.07434
	0.11088	0.05355
	0.08253	0.06993
	0.09891
	0.13293
	0.10899
	0.11907
	0.11718
	0.12726
	0.11655
	0.14049
	0.08946
	0.08379
	0.06993
	0.11277
	0.1386
	0.09387
	0.11592
	0.12285
	0.14742
	0.1071
	0.11277
	0.10458
	0.10458
	0.12285
	0.12537
	0.1134
	0.11151
	0.10017
	0.09639
	0.15876
	0.09324
	0.11718
	0.10458
	0.11529
	0.13671
	0.13041
	0.11781
	0.12096
	0.10521
	0.12159
	0.11025
	0.09387
	0.12222
	0.11277
	0.11214
	0.11088
	0.12159
	0.11151
	0.11529
	0.10206
	0.1197
	0.09072
	0.09072
	0.11025
	0.13356

## Sheet: Figure 5I
	Figure 5I	Mean intensity of IFT particles together with IFT particle size.
	particle size	ctr intensity	MO intensity
	0.146	142.581
	0.207	189.895
	0.213	147.811
	0.114	115
	0.139	101.548
	0.163	150.053
	0.285	244.602
	0.147	137.059
	0.181	140.157
	0.139	102.828
	0.148	123.885
	0.254	202.281
	0.198	170.7
	0.164	142.452
	0.152	132.484
	0.22	179.419
	0.163	126.759
	0.167	134.462
	0.11	117.889
	0.137	133.667
	0.183	150.444
	0.239	204.471
	0.203	233.087
	0.142	195.444
	0.138	114.095
	0.121	101.643
	0.135	138.889
	0.238	232.705
	0.109		45.867
	0.116		49.214
	0.127		69.556
	0.106		41.925
	0.103		31.225
	0.195		101.113
	0.174		59.749
	0.136		61.672
	0.161		81.619
	0.121		53.667
	0.112		125.325
	0.142		142.632
	0.166		174.705
	0.096		79.47
	0.133		112.827
	0.192		197.484
	0.112		106.75
	0.102		70.842
	0.121		112.194
	0.151		128.98
	0.098		89.448
	0.168		155.098
	0.124		84.37
	0.071		53.833
	0.127		55.504
	0.142		68.276
	0.146		90.241
	0.124		57.433
	0.087		43.186
	0.084		60.323
	0.091		62.419
	0.084		45.415
	0.086		66.997
	0.087		47.201

## Sheet: Figure 5K
	Figure 5K	IFT velocity in the crista cilia of 3dpf control or ift88 morphants.
	ctr MO antero	ctr MO retro	ift88 MO antero	ift88 MO retro
	0.679425	1.25893	0.609131	0.984
	0.643397	1.43998	0.686499	1.59897
	0.515429	1.36002	0.670912	1.18078
	0.78142	1.29999	0.694599	1.40572
	0.874681	1.18857	0.702865	1.04961
	0.767514	1.61941	0.849816	0.984
	0.627723	1.26288	0.577563	1.22999
	0.726289	1.25893	0.603823	1.27342
	0.598375	1.57581	0.646638	1.38919
	0.692439	1.11429	0.691464	1.38657
	0.794101	1.56331	0.814354	1.29473
	0.649026	1.59469	0.750938	1.11519
	0.618507	1.59469	0.626177	1.12977
	0.60555	1.49503	0.611676	1.29473
	0.670912	1.6343	0.57399	1.16622
	0.623189	1.94432	0.526334	0.825294
	0.655998	1.44859	0.437323	0.57399
	0.527152	1.68384	0.393592	0.799504
	0.709396	1.32108	0.447274	0.761812
	0.787205	1.47999	0.415476	0.793534
	0.85565	1.04	0.347293	0.569694
	0.918398	1.87197	0.396783	1.33131
	0.531359	1.73332	0.463056	1.29473
	0.562288	1.89089	0.477083	1.312
	0.484188	1.34332	0.250818	1.43125
	0.670912	1.60729	0.352749	1.27918
	0.57399	1.73332	0.626177	1.28349
	0.596354	1.38666	0.683338	1.15763
	0.826552	1.35198	0.614991	1.62069
	0.618507	1.48571	0.731689	1.36666
	0.614991	1.18181	0.614991	1.41453
	0.684509	1.08952	0.669127	0.878562
	0.698776	0.919079	0.826552	1.19488
	0.565802	1.04	0.826552	1.33131
	0.590406	1.04	0.655998	1.34654
	0.655998	0.891419	0.709396	1.59897
	0.756934	1.54658	0.861002	1.37758
	0.885593	1.45598	0.756934	1.22999
	0.738003	1.22911	0.780412	1.15763
	0.765334	1.64664	0.629754	1.10209
	0.718045	1.43998	0.590406	1.32839
	0.885593	1.56	0.642612	1.38657
	0.787205	1.42317	0.6	1.18899
	0.932216	1.29999	0.696994	1.14801
	1.03866	1.18857	0.601344	1.08756
	0.857038	1.76002	0.601344	0.891736
	0.890298	1.83999	0.562288	1.32462
	0.755159	1.98545	0.614991	1.312
	0.984	1.50622	0.551992	1.24641
	0.84	1.59469	0.482355	1.22153
	0.782737	1.64213	0.57399	1.13777
	0.952264	1.61779	0.662692	1.21358
	0.901986	1.34589	0.598117	0.770086
	0.880416	1.19293	0.649445	1.11237
	0.849816	1.68997	0.579852	1.06601
	0.707258	1.50223	0.434796	1.21107
	0.685274	1.68555	0.506902	1.07773
	-1.13777	1.58078	0.469639	1.02335
	0.767514	1.65175	0.534179	0.984
	0.816005	1.45598	0.452111	1.06957
	0.948845	1.89646	0.696994	1.02873
	0.787205	1.97596	0.557605	1.06957
	0.787205	1.68997	0.557605	0.888769
	0.745463	1.59469	0.447274	0.576825
	0.711826	1.71292	0.43295	1.07773
	0.906325	1.83237	0.410003	1.1685
	0.926108	1.93141	0.562288	0.77125
	1.08493	1.81037	0.870447	0.868246
	0.722926	1.88497	0.611676	1.14801
	1.10698	1.95769	0.644083	1.39398
	0.816497	2.08	0.567701	1.312
	0.881499	1.924	0.618507	1.39398
	1.16292	1.85713	0.470609	1.39398
	1.12457	1.6343	0.554614	1.25734
	0.913717	1.64213	0.522123	1.16292
	0.811378	2.08	0.451009	1.20268
	1.00588	1.84887	0.432007	1.08239
	0.861002	1.44694	0.793534	1.26514
	0.738003	1.68003	0.738003	1.18078
	0.738003	1.61197	0.868246	1.17144
	0.696994	1.57575	0.698311	0.913717
	0.477953	1.46369	0.768757	1.03866
	0.723534	1.68997	0.765334	1.00799
	0.718045	1.73332	0.718045	0.953263
	0.753714	2.02527	0.549218	0.888769
	0.807375	1.74913	0.590406	0.864009
	0.633756	1.7056	0.60555	0.848288
	0.679856	2.18403	0.594102	1.29708
	0.84342	2.27502	0.572518	1.43817
	0.787205	1.08952	0.529852	1.19271
	0.898421	1.17567	0.539617	1.22999
	0.930815	1.38666	0.669957	1.13937
	0.720417	1.56515	0.541205	1.02873
	0.66137	1.21335	0.590406	1.1979
	0.628085	1.47791	0.519331	1.2391
	0.594501	1.59056	0.927761	1.26073
	0.787205	1.43002	0.743465	0.941218
	0.805079	1.62783	0.675299	1.13937
	0.87155	1.38666	0.721604	1.12457
	0.559081	1.37089	0.536717	1.07773
	0.581449	1.56	0.50788	1.29708
	0.68581	1.58259	0.542212	1.08239
	0.569694	1.47037	0.444396	0.950072
	0.560126	1.39577	0.655998	1.02046
	0.580314	1.58735	0.626177	0.83822
	0.738003	1.73332	0.590406	0.956664
	0.711826	1.44694	0.727298	0.619562
		1.55031	0.590406	0.854534
		1.2876	0.584256	1.02873
		1.5922	0.566557	1.11519
		1.48571	0.655998	1.03319
		1.56	0.529852	1.08239
		1.73332	0.60555	0.849816
		1.36278	0.571346	1.476
		1.29999	0.738003	1.312
		1.38666	0.874681	1.10698
		1.56936	0.715627	1.27342
			0.778986	1.25734
			0.946164	1.32839
			0.774638	1.1685
			0.922487	1.26514
			0.753714	1.5463
			0.773137	1.63998
			0.749716	1.55798
			0.738003	1.476
			0.731689	1.476
			0.664191	1.7337
			0.639603	1.6786
			0.874681	1.61655
			0.984	1.50882
			0.984	1.32626
			0.918398	1.65494
			0.880416	1.69961
			0.647376	1.59317
			0.576825	1.8126
			0.559081	1.77877
			0.667722	1.60354
			0.655998	1.45009
			0.655998	1.62574
			0.913717	1.6685
			0.546676	1.57442
			0.536717	1.82223
			0.597435	1.66525
			0.57399	1.51112
			0.597435	1.32462
			0.440206	1.43817
			0.464673	1.37758
			0.491999	1.63998
			0.447274	1.66048
			0.457676	1.6786
			0.491999	1.39398
			0.467406	1.476
			0.510231	1.312
			0.583119	1.18078
			0.461253	0.610439
			0.524789	1.0358
			0.517905	0.934793
			0.447274	0.594079
				1.03085
				1.15763
				1.025
				0.984
				0.898421
				0.890298
				0.849816
				0.85565
				1.04961
				0.92932
				0.760357
				1.11817
				0.85565
				1.34181
				1.19488
				0.946164
				1.0358
				0.629367
				0.918398
				0.905278
				1.03085
				0.901986
				1.09753
				1.03085
