# Supplementary figures and images for: Ciliary length regulation by intraflagellar transport in zebrafish
Source: eLife journal article supplement (doi:10.7554/elife.93168), 2024-03-13

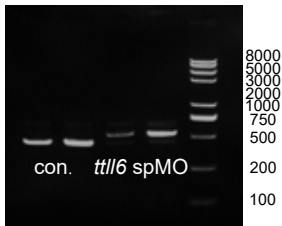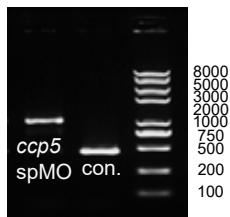

Supplement: fig4-figsupp3-data1 [file elife-93168-fig4-figsupp3-data1-v1.zip]
